# Supplementary material
Source: MDPI journal article supplement (https://www.mdpi.com/2073-431X/3/3/69)
Supplement: s1 [file s1]

Archive with 814 entries (803 files):
- ./MinimalBASIC
- ./MinimalBASIC/codegen.c
- ./MinimalBASIC/NBS
- ./MinimalBASIC/NBS/P142.BAS
- ./MinimalBASIC/NBS/P082.BAS
- ./MinimalBASIC/NBS/P006.BAS
- ./MinimalBASIC/NBS/P098.BAS
- ./MinimalBASIC/NBS/P021.BAS
- ./MinimalBASIC/NBS/P015.BAS
- ./MinimalBASIC/NBS/P140.BAS
- ./MinimalBASIC/NBS/P091.BAS
- ./MinimalBASIC/NBS/P208.BAS
- ./MinimalBASIC/NBS/P114.BAS
- ./MinimalBASIC/NBS/P136.BAS
- ./MinimalBASIC/NBS/P108.BAS
- ./MinimalBASIC/NBS/P073.BAS
- ./MinimalBASIC/NBS/P104.BAS
- ./MinimalBASIC/NBS/P201.BAS
- ./MinimalBASIC/NBS/P121.BAS
- ./MinimalBASIC/NBS/P046.BAS
- ./MinimalBASIC/NBS/P166.BAS
- ./MinimalBASIC/NBS/P023.BAS
- ./MinimalBASIC/NBS/P141.BAS
- ./MinimalBASIC/NBS/P081.BAS
- ./MinimalBASIC/NBS/P163.BAS
- ./MinimalBASIC/NBS/P138.BAS
- ./MinimalBASIC/NBS/P022.BAS
- ./MinimalBASIC/NBS/P056.BAS
- ./MinimalBASIC/NBS/P061.BAS
- ./MinimalBASIC/NBS/P182.BAS
- ./MinimalBASIC/NBS/P195.BAS
- ./MinimalBASIC/NBS/P097.BAS
- ./MinimalBASIC/NBS/P033.BAS
- ./MinimalBASIC/NBS/P066.BAS
- ./MinimalBASIC/NBS/README.NBS
- ./MinimalBASIC/NBS/P064.BAS
- ./MinimalBASIC/NBS/P118.BAS
- ./MinimalBASIC/NBS/P012.BAS
- ./MinimalBASIC/NBS/P199.BAS
- ./MinimalBASIC/NBS/P139.BAS
- ./MinimalBASIC/NBS/P038.BAS
- ./MinimalBASIC/NBS/P124.BAS
- ./MinimalBASIC/NBS/P115.BAS
- ./MinimalBASIC/NBS/P059.BAS
- ./MinimalBASIC/NBS/P122.BAS
- ./MinimalBASIC/NBS/P037.BAS
- ./MinimalBASIC/NBS/P105.BAS
- ./MinimalBASIC/NBS/P026.BAS
- ./MinimalBASIC/NBS/P116.BAS
- ./MinimalBASIC/NBS/P085.BAS
- ./MinimalBASIC/NBS/P086.BAS
- ./MinimalBASIC/NBS/P155.BAS
- ./MinimalBASIC/NBS/P040.BAS
- ./MinimalBASIC/NBS/P093.BAS
- ./MinimalBASIC/NBS/P193.BAS
- ./MinimalBASIC/NBS/P034.BAS
- ./MinimalBASIC/NBS/P039.BAS
- ./MinimalBASIC/NBS/P171.BAS
- ./MinimalBASIC/NBS/P016.BAS
- ./MinimalBASIC/NBS/P125.BAS
- ./MinimalBASIC/NBS/P013.BAS
- ./MinimalBASIC/NBS/P192.BAS
- ./MinimalBASIC/NBS/P077.BAS
- ./MinimalBASIC/NBS/P011.BAS
- ./MinimalBASIC/NBS/P123.BAS
- ./MinimalBASIC/NBS/P172.BAS
- ./MinimalBASIC/NBS/P095.BAS
- ./MinimalBASIC/NBS/P134.BAS
- ./MinimalBASIC/NBS/P090.BAS
- ./MinimalBASIC/NBS/P152.BAS
- ./MinimalBASIC/NBS/P176.BAS
- ./MinimalBASIC/NBS/P057.BAS
- ./MinimalBASIC/NBS/P206.BAS
- ./MinimalBASIC/NBS/P024.BAS
- ./MinimalBASIC/NBS/P175.BAS
- ./MinimalBASIC/NBS/P162.BAS
- ./MinimalBASIC/NBS/P084.BAS
- ./MinimalBASIC/NBS/P047.BAS
- ./MinimalBASIC/NBS/P149.BAS
- ./MinimalBASIC/NBS/P113.BAS
- ./MinimalBASIC/NBS/P187.BAS
- ./MinimalBASIC/NBS/P062.BAS
- ./MinimalBASIC/NBS/P014.BAS
- ./MinimalBASIC/NBS/P117.BAS
- ./MinimalBASIC/NBS/P071.BAS
- ./MinimalBASIC/NBS/P183.BAS
- ./MinimalBASIC/NBS/P058.BAS
- ./MinimalBASIC/NBS/P129.BAS
- ./MinimalBASIC/NBS/P048.BAS
- ./MinimalBASIC/NBS/P194.BAS
- ./MinimalBASIC/NBS/P068.BAS
- ./MinimalBASIC/NBS/P185.BAS
- ./MinimalBASIC/NBS/P003.BAS
- ./MinimalBASIC/NBS/P170.BAS
- ./MinimalBASIC/NBS/P030.BAS
- ./MinimalBASIC/NBS/P020.BAS
- ./MinimalBASIC/NBS/P054.BAS
- ./MinimalBASIC/NBS/P179.BAS
- ./MinimalBASIC/NBS/P119.BAS
- ./MinimalBASIC/NBS/P067.BAS
- ./MinimalBASIC/NBS/P032.BAS
- ./MinimalBASIC/NBS/P204.BAS
- ./MinimalBASIC/NBS/P107.BAS
- ./MinimalBASIC/NBS/P146.BAS
- ./MinimalBASIC/NBS/P174.BAS
- ./MinimalBASIC/NBS/P004.BAS
- ./MinimalBASIC/NBS/P132.BAS
- ./MinimalBASIC/NBS/P036.BAS
- ./MinimalBASIC/NBS/P168.BAS
- ./MinimalBASIC/NBS/P130.BAS
- ./MinimalBASIC/NBS/P207.BAS
- ./MinimalBASIC/NBS/P008.BAS
- ./MinimalBASIC/NBS/P103.BAS
- ./MinimalBASIC/NBS/P043.BAS
- ./MinimalBASIC/NBS/P050.BAS
- ./MinimalBASIC/NBS/P143.BAS
- ./MinimalBASIC/NBS/P165.BAS
- ./MinimalBASIC/NBS/P029.BAS
- ./MinimalBASIC/NBS/P010.BAS
- ./MinimalBASIC/NBS/P157.BAS
- ./MinimalBASIC/NBS/P051.BAS
- ./MinimalBASIC/NBS/P028.BAS
- ./MinimalBASIC/NBS/P075.BAS
- ./MinimalBASIC/NBS/P188.BAS
- ./MinimalBASIC/NBS/P137.BAS
- ./MinimalBASIC/NBS/P186.BAS
- ./MinimalBASIC/NBS/P080.BAS
- ./MinimalBASIC/NBS/P092.BAS
- ./MinimalBASIC/NBS/P100.BAS
- ./MinimalBASIC/NBS/P160.BAS
- ./MinimalBASIC/NBS/P094.BAS
- ./MinimalBASIC/NBS/P088.BAS
- ./MinimalBASIC/NBS/P205.BAS
- ./MinimalBASIC/NBS/P156.BAS
- ./MinimalBASIC/NBS/P065.BAS
- ./MinimalBASIC/NBS/P126.BAS
- ./MinimalBASIC/NBS/P002.BAS
- ./MinimalBASIC/NBS/P153.BAS
- ./MinimalBASIC/NBS/P053.BAS
- ./MinimalBASIC/NBS/P060.BAS
- ./MinimalBASIC/NBS/P120.BAS
- ./MinimalBASIC/NBS/P074.BAS
- ./MinimalBASIC/NBS/P076.BAS
- ./MinimalBASIC/NBS/P083.BAS
- ./MinimalBASIC/NBS/P063.BAS
- ./MinimalBASIC/NBS/P196.BAS
- ./MinimalBASIC/NBS/P005.BAS
- ./MinimalBASIC/NBS/P200.BAS
- ./MinimalBASIC/NBS/P009.BAS
- ./MinimalBASIC/NBS/P147.BAS
- ./MinimalBASIC/NBS/P087.BAS
- ./MinimalBASIC/NBS/P072.BAS
- ./MinimalBASIC/NBS/P169.BAS
- ./MinimalBASIC/NBS/P128.BAS
- ./MinimalBASIC/NBS/P203.BAS
- ./MinimalBASIC/NBS/P189.BAS
- ./MinimalBASIC/NBS/P035.BAS
- ./MinimalBASIC/NBS/P096.BAS
- ./MinimalBASIC/NBS/P191.BAS
- ./MinimalBASIC/NBS/P151.BAS
- ./MinimalBASIC/NBS/P099.BAS
- ./MinimalBASIC/NBS/P041.BAS
- ./MinimalBASIC/NBS/P001.BAS
- ./MinimalBASIC/NBS/P190.BAS
- ./MinimalBASIC/NBS/P079.BAS
- ./MinimalBASIC/NBS/P144.BAS
- ./MinimalBASIC/NBS/P159.BAS
- ./MinimalBASIC/NBS/P102.BAS
- ./MinimalBASIC/NBS/P019.BAS
- ./MinimalBASIC/NBS/P173.BAS
- ./MinimalBASIC/NBS/P127.BAS
- ./MinimalBASIC/NBS/P031.BAS
- ./MinimalBASIC/NBS/P202.BAS
- ./MinimalBASIC/NBS/P154.BAS
- ./MinimalBASIC/NBS/P042.BAS
- ./MinimalBASIC/NBS/P070.BAS
- ./MinimalBASIC/NBS/P052.BAS
- ./MinimalBASIC/NBS/P161.BAS
- ./MinimalBASIC/NBS/P198.BAS
- ./MinimalBASIC/NBS/P180.BAS
- ./MinimalBASIC/NBS/P069.BAS
- ./MinimalBASIC/NBS/P078.BAS
- ./MinimalBASIC/NBS/P178.BAS
- ./MinimalBASIC/NBS/P007.BAS
- ./MinimalBASIC/NBS/P145.BAS
- ./MinimalBASIC/NBS/P112.BAS
- ./MinimalBASIC/NBS/P177.BAS
- ./MinimalBASIC/NBS/P133.BAS
- ./MinimalBASIC/NBS/P131.BAS
- ./MinimalBASIC/NBS/P197.BAS
- ./MinimalBASIC/NBS/P167.BAS
- ./MinimalBASIC/NBS/P184.BAS
- ./MinimalBASIC/NBS/P027.BAS
- ./MinimalBASIC/NBS/P164.BAS
- ./MinimalBASIC/NBS/P148.BAS
- ./MinimalBASIC/NBS/P089.BAS
- ./MinimalBASIC/NBS/P044.BAS
- ./MinimalBASIC/NBS/P055.BAS
- ./MinimalBASIC/NBS/P045.BAS
- ./MinimalBASIC/NBS/P018.BAS
- ./MinimalBASIC/NBS/P025.BAS
- ./MinimalBASIC/NBS/P135.BAS
- ./MinimalBASIC/NBS/P110.BAS
- ./MinimalBASIC/NBS/P106.BAS
- ./MinimalBASIC/NBS/P181.BAS
- ./MinimalBASIC/NBS/P109.BAS
- ./MinimalBASIC/NBS/P049.BAS
- ./MinimalBASIC/NBS/P150.BAS
- ./MinimalBASIC/NBS/P111.BAS
- ./MinimalBASIC/NBS/P017.BAS
- ./MinimalBASIC/NBS/P101.BAS
- ./MinimalBASIC/NBS/P158.BAS
- ./MinimalBASIC/HAM_run_output
- ./MinimalBASIC/HAM_run_output/P216_NARROW.run
- ./MinimalBASIC/HAM_run_output/P214_NARROW.run
- ./MinimalBASIC/HAM_run_output/P215.run
- ./MinimalBASIC/HAM_run_output/P218_NARROW.run
- ./MinimalBASIC/HAM_run_output/P212.run
- ./MinimalBASIC/HAM_run_output/P215_NARROW.run
- ./MinimalBASIC/HAM_run_output/P217_NARROW.run
- ./MinimalBASIC/HAM_run_output/P210.run
- ./MinimalBASIC/HAM_run_output/P214.run
- ./MinimalBASIC/HAM_run_output/P210_NARROW.run
- ./MinimalBASIC/HAM_run_output/P218.run
- ./MinimalBASIC/HAM_run_output/P209.run
- ./MinimalBASIC/HAM_run_output/P211_NARROW.run
- ./MinimalBASIC/HAM_run_output/P212_NARROW.run
- ./MinimalBASIC/HAM_run_output/P217.run
- ./MinimalBASIC/HAM_run_output/P211.run
- ./MinimalBASIC/HAM_run_output/P216.run
- ./MinimalBASIC/tests
- ./MinimalBASIC/tests/SQRT.BAS
- ./MinimalBASIC/tests/DERIVATIVE.BAS
- ./MinimalBASIC/tests/DIM.BAS
- ./MinimalBASIC/tests/A01.BAS
- ./MinimalBASIC/tests/EXP.BAS
- ./MinimalBASIC/tests/TESTEQ.BAS
- ./MinimalBASIC/tests/dumbsine.c
- ./MinimalBASIC/tests/TANGENT.BAS
- ./MinimalBASIC/tests/RDUNINIT.BAS
- ./MinimalBASIC/tests/GOSUBNEST.BAS
- ./MinimalBASIC/tests/EX10.BAS
- ./MinimalBASIC/tests/LOG.BAS
- ./MinimalBASIC/tests/EX07.BAS
- ./MinimalBASIC/tests/TESTGT.BAS
- ./MinimalBASIC/tests/A02_B1.BAS
- ./MinimalBASIC/tests/EX18.BAS
- ./MinimalBASIC/tests/SGNTEST.BAS
- ./MinimalBASIC/tests/EX06.BAS
- ./MinimalBASIC/tests/EX22.BAS
- ./MinimalBASIC/tests/STRINGNE.BAS
- ./MinimalBASIC/tests/CRAZY.BAS
- ./MinimalBASIC/tests/FORTEST5.BAS
- ./MinimalBASIC/tests/EX16.BAS
- ./MinimalBASIC/tests/EX08.BAS
- ./MinimalBASIC/tests/EX20.BAS
- ./MinimalBASIC/tests/test013.bas
- ./MinimalBASIC/tests/FORTEST2.BAS
- ./MinimalBASIC/tests/READUQSTRING.BAS
- ./MinimalBASIC/tests/LET.BAS
- ./MinimalBASIC/tests/EX04.BAS
- ./MinimalBASIC/tests/test004.bas
- ./MinimalBASIC/tests/test001.bas
- ./MinimalBASIC/tests/ONGOTO.BAS
- ./MinimalBASIC/tests/TESTNE.BAS
- ./MinimalBASIC/tests/test011.bas
- ./MinimalBASIC/tests/EX14.BAS
- ./MinimalBASIC/tests/COSINE.BAS
- ./MinimalBASIC/tests/INPUTNUM.BAS
- ./MinimalBASIC/tests/PRINTTEST.BAS
- ./MinimalBASIC/tests/DIVOVERFLOW.BAS
- ./MinimalBASIC/tests/STOP.BAS
- ./MinimalBASIC/tests/INPUTSTRING.BAS
- ./MinimalBASIC/tests/RND2.BAS
- ./MinimalBASIC/tests/print2.bas
- ./MinimalBASIC/tests/STRINGY.BAS
- ./MinimalBASIC/tests/UDFOUCH.BAS
- ./MinimalBASIC/tests/UDFNEST.BAS
- ./MinimalBASIC/tests/BADPOWER.BAS
- ./MinimalBASIC/tests/ARRAY.BAS
- ./MinimalBASIC/tests/EX17.BAS
- ./MinimalBASIC/tests/READNUMBER.BAS
- ./MinimalBASIC/tests/MULOVERFLOW.BAS
- ./MinimalBASIC/tests/test002.bas
- ./MinimalBASIC/tests/test007.bas
- ./MinimalBASIC/tests/NOEND.BAS
- ./MinimalBASIC/tests/A03_B1.BAS
- ./MinimalBASIC/tests/BADONGOTO.BAS
- ./MinimalBASIC/tests/EX11.BAS
- ./MinimalBASIC/tests/DUMBSINE.BAS
- ./MinimalBASIC/tests/EX19.BAS
- ./MinimalBASIC/tests/EX09.BAS
- ./MinimalBASIC/tests/test009.bas
- ./MinimalBASIC/tests/test003.bas
- ./MinimalBASIC/tests/EX01.BAS
- ./MinimalBASIC/tests/EX21.BAS
- ./MinimalBASIC/tests/test010.bas
- ./MinimalBASIC/tests/BADEND.BAS
- ./MinimalBASIC/tests/test005.bas
- ./MinimalBASIC/tests/PRINT.BAS
[truncated: 514 more entries]
