# Supplementary material
Source: MDPI journal article supplement (https://www.mdpi.com/2073-431X/3/3/69)
Supplement: s1 [file s1 › ./MinimalBASIC/NBS/P002.BAS]

10 PRINT "PROGRAM FILE 2: THE END-STATEMENT."
20 PRINT "    ANSI STANDARD 4.2, 4.4"
30 PRINT
40 PRINT "SECTION 2.1: THE END-STATEMENT."
50 PRINT
60 PRINT "THIS PROGRAM TESTS TO SEE IF THE PROCESSOR TERMINATES"
70 PRINT "THE BASIC PROGRAM WHEN IT ENCOUNTERS AN END STATEMENT."
80 PRINT
90 PRINT "                              BEGIN TEST."
100 PRINT
110 PRINT "*** TEST PASSES IF 'END PROGRAM 2' IS THE LAST OUTPUT"
120 PRINT "    GENERATED BY THIS PROGRAM, FOLLOWED BY NORMAL "
125 PRINT "    TERMINATION OF EXECUTION. ***"
130 PRINT
140 PRINT "                              END TEST."
150 PRINT
160 PRINT "END PROGRAM 2"
170 END
