# Supplementary material
Source: MDPI journal article supplement (https://www.mdpi.com/2073-431X/3/3/69)
Supplement: s1 [file s1 › ./MinimalBASIC/NBS/P006.BAS]

10 PRINT "PROGRAM FILE 6: PRINT-SEPARATORS, TABS,"
15 PRINT "        AND STRING VARIABLES."
20 PRINT "    ANSI STANDARD 6.2, 6.4, 9.4, 12.2, 12.4"
30 PRINT
40 PRINT "SECTION 6.1: SEMICOLON SEPARATOR WITH QUOTED STRINGS."
60 PRINT
70 PRINT "                               BEGIN TEST."
80 PRINT
90 PRINT "                                1. 123"
100 PRINT "                                2. 1";"2";"3"
110 PRINT "                                3. 1";
120 PRINT "23"
130 PRINT "                                4. 12";
140 PRINT "3"
150 PRINT "                                5. 1";
160 PRINT "2";
170 PRINT "3"
180 PRINT
190 PRINT "*** TEST PASSED IF THERE ARE EXACTLY FIVE NUMBERED LINES"
200 PRINT "    ABOVE, EACH CONTAINING THE ADJACENT DIGITS '123', AND"
205 PRINT "    IF THEY ARE LINED UP IN A COLUMN ***"
210 PRINT
220 PRINT "                                END TEST."
380 PRINT
390 PRINT "SECTION 6.2: THE COMMA SEPARATOR WITH QUOTED STRINGS."
410 PRINT
420 PRINT "                               BEGIN TEST."
430 PRINT
440 PRINT "THE PRINT LINE SHOULD BE DIVIDED INTO EQUAL ZONES WHICH "
450 PRINT "ENABLE THE COMMA SEPARATOR TO ACT AS A TAB WHEN PRINTING"
460 PRINT "A SERIES OF COMMA-SEPARATED ITEMS."
470 PRINT
480 PRINT "00000000011111111112222222222333333333344444444445";
490 PRINT "5555555556"
500 PRINT "12345678901234567890123456789012345678901234567890";
510 PRINT "1234567890"
520 PRINT "XYZ","XYZ","XYZ"
530 PRINT
540 PRINT "*** TEST PASSED IF 3 SETS OF THE CHARACTERS 'XYZ' ARE EVENLY"
550 PRINT "    SPACED ON A SINGLE LINE IN THE ABOVE TEST AND WIDTH"
555 PRINT "    OF A PRINT ZONE IS AS DOCUMENTED ***"
560 PRINT
570 PRINT "                                  END TEST."
580 PRINT
590 PRINT "SECTION 6.3: TABBING QUOTED STRINGS."
610 PRINT
620 PRINT "                               BEGIN TEST."
630 PRINT
640 PRINT "00000000011111111112222222222333333333344444444445";
650 PRINT "5555555556"
660 PRINT "12345678901234567890123456789012345678901234567890";
670 PRINT "1234567890"
680 PRINT TAB(24);"1"
690 PRINT TAB(48);"2"
700 PRINT TAB(59);"3"
710 PRINT
720 PRINT "*** TEST PASSED IF A '1' IS PRINTED BELOW COLUMN HEADING 24."
730 PRINT "    A '2' BELOW 48 AND A '3' BELOW 59 IN THE ABOVE TEST  ***"
740 PRINT
750 PRINT "                                END TEST."
760 PRINT
770 PRINT "SECTION 6.4: THE ASSIGNMENT OF QUOTED STRINGS."
790 PRINT
800 PRINT "                               BEGIN TEST."
810 PRINT
820 PRINT "THIS TEST ASSIGNS THE SAME QUOTED STRING TO ALL LEGAL STRING"
830 PRINT "VARIABLES: A$ THROUGH Z$, USING A SERIES OF LET-STATEMENTS."
840 PRINT "A$ IS ASSIGNED THE QUOTED STRING, THEN B$ IS ASSIGNED A$ ..."
850 PRINT "THROUGH Z$ ASSIGNED Y$."
860 PRINT
870 LET A$="18 CHARACTERS LONG"
880 LET B$=A$
890 LET C$=B$
900 LET D$=C$
910 LET E$=D$
920 LET F$=E$
930 LET G$=F$
940 LET H$=G$
950 LET I$=H$
960 LET J$=I$
970 LET K$=J$
980 LET L$=K$
990 LET M$=L$
1000 LET N$=M$
1010 LET O$=N$
1020 LET P$=O$
1030 LET Q$=P$
1040 LET R$=Q$
1050 LET S$=R$
1060 LET T$=S$
1070 LET U$=T$
1080 LET V$=U$
1090 LET W$=V$
1100 LET X$=W$
1110 LET Y$=X$
1120 LET Z$=Y$
1130 PRINT "                   Z$ = ";Z$
1140 PRINT
1150 PRINT "*** TEST PASSED IF 'Z$ = 18 CHARACTERS LONG' IS PRINTED"
1160 PRINT "    IN THE ABOVE TEST  ***"
1170 PRINT
1180 PRINT "                                END TEST."
1190 PRINT
1200 PRINT "SECTION 6.5: SEMICOLON SEPARATOR WITH ASSIGNED STRINGS"
1210 PRINT "        AND CONSTANTS."
1220 PRINT
1230 PRINT "                               BEGIN TEST."
1240 PRINT
1250 LET A$="123"
1260 LET B$="1"
1270 LET C$="2"
1280 LET D$="3"
1290 LET E$="12"
1300 LET F$="23"
1310 PRINT "                              1.";A$
1320 PRINT "                              2.";B$;C$;D$
1330 PRINT "                              3.";B$;
1340 PRINT F$
1350 PRINT "                              4.";"12";
1360 PRINT D$
1370 PRINT "                              5.";B$;
1380 PRINT "2";
1390 PRINT D$
1400 PRINT
1410 PRINT "*** TEST PASSED IF THERE ARE EXACTLY FIVE NUMBERED LINES"
1420 PRINT "    ABOVE, EACH CONTAINING THE ADJACENT DIGITS '123', AND"
1425 PRINT "    IF THEY ARE LINED UP IN A COLUMN ***"
1430 PRINT
1440 PRINT "                                END TEST."
1450 PRINT
1460 PRINT "SECTION 6.6: COMMA SEPARATOR - ASSIGNED STRINGS"
1470 PRINT "        AND CONSTANTS."
1480 PRINT
1490 PRINT "                               BEGIN TEST."
1500 PRINT
1510 LET A$="XYZ"
1530 LET C$="XYZ"
1540 PRINT "00000000011111111112222222222333333333344444444445";
1550 PRINT "5555555556"
1560 PRINT "12345678901234567890123456789012345678901234567890";
1570 PRINT "1234567890"
1580 PRINT A$,"XYZ",C$
1590 PRINT
1600 PRINT "*** TEST PASSED IF 3 SETS OF THE CHARACTERS 'XYZ' ARE "
1610 PRINT "    EVENLY SPACED ON A SINGLE LINE IN THE ABOVE TEST AND "
1615 PRINT "    WIDTH OF PRINT ZONE IS AS DOCUMENTED ***"
1620 PRINT
1630 PRINT "                                END TEST."
1640 PRINT
1650 PRINT "SECTION 6.7: TABBING ASSIGNED STRINGS AND CONSTANTS."
1670 PRINT
1680 PRINT "                               BEGIN TEST."
1690 PRINT
1700 LET A$="1"
1720 LET C$="3"
1730 PRINT "00000000011111111112222222222333333333344444444445";
1740 PRINT "5555555556"
1750 PRINT "12345678901234567890123456789012345678901234567890";
1760 PRINT "1234567890"
1770 PRINT TAB(24);A$
1780 PRINT TAB(48);"2"
1790 PRINT TAB(59);C$
1800 PRINT
1810 PRINT "*** TEST PASSED IF A '1' PRINTS BELOW COLUMN HEADING 24,"
1820 PRINT "    A '2' BELOW 48, AND A '3' BELOW 59   ***"
1830 PRINT
1840 PRINT "                                END TEST."
1850 PRINT
1860 PRINT "SECTION 6.8: NULL PRINT ITEMS."
1870 PRINT
1880 PRINT "THIS TEST DETERMINES WHETHER THE PROCESSOR RECOGNIZES"
1890 PRINT "CONSECUTIVE COMMAS IN A PRINT-STATEMENT AS TAB POSITIONS."
1900 PRINT
1910 PRINT "                               BEGIN TEST."
1920 PRINT
1930 PRINT "00000000011111111112222222222333333333344444444445";
1940 PRINT "5555555556"
1950 PRINT "12345678901234567890123456789012345678901234567890";
1960 PRINT "1234567890"
1965 PRINT "PRINT-ZONE IDENTIFIERS:"
1970 PRINT "1","2","3","4"
1980 PRINT  , , ,"A"
1990 PRINT
2000 PRINT "*** TEST PASSED IF AN 'A' IS IN THE BEGINNING COLUMN OF THE"
2010 PRINT "    FOURTH PRINT ZONE FOR THIS SYSTEM  ***"
2020 PRINT
2030 PRINT "                               END TEST."
2040 PRINT
2050 PRINT "END PROGRAM 6"
2060 END
