# Supplementary material
Source: MDPI journal article supplement (https://www.mdpi.com/2073-431X/3/3/69)
Supplement: s1 [file s1 › ./MinimalBASIC/NBS/P021.BAS]

10 PRINT "PROGRAM FILE 21: ERROR - TRANSFER TO NON-EXISTING LINE"
15 PRINT "        NUMBER USING THE IF-THEN-STATEMENT."
20 PRINT "    ANSI STANDARD 10.4"
30 PRINT
40 PRINT "SECTION 21.1: ERROR - TRANSFER TO NON-EXISTING LINE NUMBER"
50 PRINT "        USING THE IF-THEN-STATEMENT."
60 PRINT
70 PRINT "THIS IS A TEST FOR A NON-STANDARD FEATURE OF MINIMAL BASIC."
80 PRINT "TO PASS THIS TEST, THE PROCESSOR MUST EITHER:"
90 PRINT
100 PRINT "   1) ACCEPT THE PROGRAM AND BE ACCOMPANIED BY DOCUMENTATION"
110 PRINT "      ACCURATELY DESCRIBING THE FEATURE'S INTERPRETATION"
120 PRINT "      BY THE PROCESSOR, OR"
130 PRINT
140 PRINT "   2) REJECT THE PROGRAM WITH AN APPROPRIATE ERROR MESSAGE"
150 PRINT
160 PRINT "SEE THE NBS MINIMAL BASIC TEST PROGRAMS USER'S MANUAL"
170 PRINT "FOR DETAILED CRITERIA."
180 PRINT
190 PRINT "                               BEGIN TEST."
200 PRINT
230 LET A$="LINE 300."
240 LET A=5
250 IF A=5 THEN 295
260 PRINT "IF THIS MESSAGE APPEARS THE IF-THEN-STATEMENT WAS NOT"
270 PRINT "EXECUTED."
280 GOTO 310
290 LET A$="LINE 290."
300 PRINT "'IF A=5 THEN 295' JUMPED TO ";A$
310 PRINT
320 PRINT "                               END TEST."
330 PRINT
340 PRINT "END PROGRAM 21"
350 END
