# Supplementary material
Source: MDPI journal article supplement (https://www.mdpi.com/2073-431X/3/3/69)
Supplement: s1 [file s1 › ./MinimalBASIC/NBS/P024.BAS]

10 PRINT "PROGRAM FILE 24: PLUS AND MINUS"
20 PRINT "    ANSI STANDARD 7.2, 7.4"
30 PRINT
40 PRINT "THIS PROGRAM TESTS THE GROSS SEMANTIC CHARACTERISTICS OF"
50 PRINT "THE PLUS AND MINUS OPERATORS FOR THE CONSTRUCTION OF"
60 PRINT "NUMERIC EXPRESSIONS."
70 PRINT
80 PRINT "EXPRESSIONS USING ONLY ONE OPERATOR AND CONSTANTS AND"
90 PRINT "SIMPLE VARIABLES ARE EVALUATED, AND THE RESULTS TESTED"
100 PRINT "AGAINST THE CORRECT VALUE. CONSTANTS ARE EXPRESSED IN"
110 PRINT "NR1, NR2, AND NR3 FORM, BUT ARE GENERALLY RESTRICTED TO"
120 PRINT "INTEGER VALUES TO AVOID ACCURACY PROBLEMS (ACCURACY IS"
130 PRINT "ADDRESSED IN LATER TESTS)."
140 PRINT
142 REM S IS A SWITCH TO INDICATE UNARY (S=0) OR BINARY (S=1)
143 REM OPERATIONS
145 LET S=0
150 LET M$="24.1: UNARY MINUS"
160 GOSUB 7000
170 LET N$="CONSTANTS"
180 LET O$="1"
190 LET A=-3
200 IF A>0 THEN 250
210 IF A<>-3 THEN 250
220 IF A<-3.1 THEN 250
230 IF A>-2.9 THEN 250
240 IF A=-3 THEN 260
250 GOSUB 9000
260 LET A=-0
270 LET O$="2"
280 IF A=0 THEN 300
290 GOSUB 9000
300 LET A=-432.0000
310 LET O$="3"
320 IF -432=A THEN 340
330 GOSUB 9000
340 LET A=-2E2
350 LET O$="4"
360 IF A=-200 THEN 380
370 GOSUB 9000
380 LET A=-200E-1
390 LET O$="5"
400 IF A=-20 THEN 420
410 GOSUB 9000
420 LET N$="VARIABLES"
430 LET B=34
440 LET O$="6"
450 LET A=-B
460 IF A=-34 THEN 480
470 GOSUB 9000
480 LET C=-B
490 LET A=-C
500 LET O$="7"
510 IF A=34 THEN 530
520 GOSUB 9000
530 LET B=-99
540 LET B=-B
550 LET A=-B
560 LET O$="8"
570 IF A=-99 THEN 590
580 GOSUB 9000
590 GOSUB 8000
600 LET M$="24.2: UNARY PLUS"
610 GOSUB 7000
620 LET N$="CONSTANTS"
630 LET O$="1"
640 LET A=+5
650 IF A=5 THEN 670
660 GOSUB 9000
670 LET A=+0
680 LET O$="2"
690 IF A=0 THEN 710
700 GOSUB 9000
710 LET A=+123.00
720 LET O$="3"
730 IF A=123 THEN 750
740 GOSUB 9000
750 LET A=+87E2
760 IF A=8700 THEN 790
780 GOSUB 9000
790 LET A=+.0054E+5
800 LET O$="5"
810 IF A=540 THEN 830
820 GOSUB 9000
830 LET N$="VARIABLES"
840 LET B=47
850 LET O$="6"
860 LET A=+B
870 IF A=47 THEN 890
880 GOSUB 9000
890 LET B=-88
900 LET O$="7"
910 LET C=+B
920 LET B=+C
930 LET A=+B
940 IF A=-88 THEN 960
950 GOSUB 9000
960 GOSUB 8000
965 LET S=1
970 LET M$="23.3: ADDITION"
980 LET N$="CONSTANTS"
990 GOSUB 7000
1000 LET A=3+6
1010 LET O$="1"
1020 LET Y=9
1030 GOSUB 8500
1040 LET A=34.00+32
1050 LET O$="2"
1060 LET Y=66
1070 GOSUB 8500
1080 LET A=23E2+2
1090 LET O$="3"
1100 LET Y=2302
1110 GOSUB 8500
1120 LET A=33.000+880E-1
1130 LET O$="4"
1140 LET Y=121
1150 GOSUB 8500
1160 LET N$="VAR. & CONSTS."
1170 LET A=-34
1180 LET B=-98.0
1190 LET A=A+B
1200 LET O$="5"
1210 LET Y=-132
1220 GOSUB 8500
1230 LET B=94
1240 LET C=-73
1250 LET A=B+C
1260 LET O$="6"
1270 LET Y=21
1280 GOSUB 8500
1290 LET C=434
1300 LET B=-654
1310 LET A=B+C
1320 LET O$="7"
1330 LET Y=-220
1340 GOSUB 8500
1350 LET B=-98
1360 LET A=2E2+B
1370 LET O$="8"
1380 LET Y=102
1390 GOSUB 8500
1400 LET B=13.0E1
1410 LET A=B+22
1420 LET O$="9"
1430 LET Y=152
1440 GOSUB 8500
1450 LET B=22
1460 LET C=-22
1470 LET O$="10"
1480 LET A=B+C
1490 LET Y=0
1500 GOSUB 8500
1510 LET A=0+C
1520 LET O$="11"
1530 LET Y=-22
1540 GOSUB 8500
1550 LET A=C+C
1560 LET O$="12"
1570 LET Y=-44
1580 GOSUB 8500
1590 GOSUB 8000
1600 LET M$="24.4: SUBTRACTION"
1610 LET N$="CONSTANTS"
1620 GOSUB 7000
1630 LET O$="1"
1640 LET A=48-29
1650 LET Y=19
1660 GOSUB 8500
1670 LET A=47-646
1680 LET O$="2"
1690 LET Y=-599
1700 GOSUB 8500
1710 LET A=.00532E5-777.
1720 LET O$="3"
1730 LET Y=-245
1740 GOSUB 8500
1750 LET N$="VARS. & CONSTS."
1760 LET B=-56
1770 LET C=-93
1780 LET A=B-C
1790 LET O$="4"
1800 LET Y=37
1810 GOSUB 8500
1820 LET A=C-B
1830 LET O$="5"
1840 LET Y=-37
1850 GOSUB 8500
1860 LET B=-345.000
1870 LET A=2-B
1880 LET O$="6"
1890 LET Y=347
1900 GOSUB 8500
1910 LET A=B-.111E3
1920 LET O$="7"
1930 LET Y=-456
1940 GOSUB 8500
1950 LET A=B-987
1960 LET O$="8"
1970 LET Y=-1332
1980 GOSUB 8500
1990 LET A=888.0-B
2000 LET O$="9"
2010 LET Y=1233
2020 GOSUB 8500
2030 LET B=22
2040 LET A=22-B
2050 LET O$="10"
2060 LET Y=0
2070 GOSUB 8500
2080 LET A=0-B
2090 LET O$="11"
2100 LET Y=-22
2110 GOSUB 8500
2120 LET B=-87
2130 LET A=B-B
2140 LET O$="12"
2150 LET Y=0
2160 GOSUB 8500
2170 GOSUB 8000
6000 PRINT
6010 PRINT "END PROGRAM 24"
6020 STOP
7000 REM SUBROUTINE TO BEGIN SECTION
7010 PRINT
7020 PRINT "SECTION ";M$
7030 PRINT
7040 PRINT "               BEGIN TEST"
7050 PRINT
7060 LET R$="PASSED"
7070 IF S=0 THEN 7300
7080 PRINT "CASE #","SHOULD BE","ACTUAL","OUTCOME"
7090 PRINT
7300 RETURN
8000 REM SUBROUTINE TO END SECTION
8010 PRINT
8040 PRINT "*** TEST ";R$;"  ***"
8060 PRINT
8070 PRINT "                END TEST"
8080 PRINT
8090 RETURN
8500 REM REPORT RESULTS OF TEST CASE
8505 PRINT O$,Y,A,
8510 IF Y=A THEN 8550
8520 PRINT "TEST FAILS"
8530 LET R$="FAILED"
8540 GOTO 8560
8550 PRINT "TEST PASSES"
8560 RETURN
9000 REM HANDLE ERROR REPORT
9010 PRINT "ERROR IN TEST OF ";M$;". ";N$;", CASE #";O$
9020 LET R$="FAILED"
9030 RETURN
9040 END
