# Supplementary material
Source: MDPI journal article supplement (https://www.mdpi.com/2073-431X/3/3/69)
Supplement: s1 [file s1 › ./MinimalBASIC/NBS/P032.BAS]

10 PRINT "PROGRAM FILE 32: EXCEPTION - NEGATIVE QUANTITY RAISED TO A"
20 PRINT "        NON-INTEGRAL POWER."
30 PRINT "    ANSI STANDARD 7.5"
40 PRINT
50 PRINT "SECTION 32.1: EXCEPTION - NEGATIVE QUANTITY RAISED TO A"
60 PRINT "        NON-INTEGRAL POWER."
70 PRINT
80 PRINT "TO PASS THIS TEST:"
90 PRINT
100 PRINT "    1) A MESSAGE IDENTIFYING THE EXCEPTION MUST BE"
110 PRINT "       DISPLAYED, AND"
120 PRINT
130 PRINT "    2) EXECUTION MUST TERMINATE"
140 PRINT
150 PRINT "               BEGIN TEST"
160 PRINT
170 PRINT "ABOUT TO ATTEMPT EVALUATION OF (-2) ^ 6.00001:"
200 PRINT
210 LET B=6.00001
220 LET A=-2
230 LET C=A^B
240 PRINT
250 PRINT "VALUE SUPPLIED = ";C
260 PRINT
270 PRINT "*** TEST FAILED: EXECUTION DID NOT TERMINATE. ***"
280 PRINT
290 PRINT "                END TEST"
300 PRINT
310 PRINT "END PROGRAM 32"
320 END
