# Supplementary material
Source: MDPI journal article supplement (https://www.mdpi.com/2073-431X/3/3/69)
Supplement: s1 [file s1 › ./MinimalBASIC/NBS/P036.BAS]

10 PRINT "PROGRAM FILE 36: ERROR - UNMATCHED PARENTHESIS IN"
15 PRINT "        NUMERIC EXPRESSION."
20 PRINT "    ANSI STANDARD 7.2"
30 PRINT
40 PRINT "SECTION 36.1: ERROR - UNMATCHED PARENTHESIS IN"
45 PRINT "        NUMERIC EXPRESSION."
50 PRINT
60 PRINT "THIS SECTION TESTS WHETHER THE PROCESSOR DETECTS AND REPORTS"
70 PRINT "A NUMERIC EXPRESSION WHICH IS IMPROPERLY FORMED BECAUSE THE"
80 PRINT "PARENTHESES ARE NOT MATCHED."
100 PRINT
110 PRINT "THIS IS A TEST FOR A NON-STANDARD FEATURE OF MINIMAL BASIC."
120 PRINT "TO PASS THIS TEST, THE PROCESSOR MUST EITHER:"
130 PRINT
140 PRINT "   1) ACCEPT THE PROGRAM AND BE ACCOMPANIED BY DOCUMENTATION"
150 PRINT "      ACCURATELY DESCRIBING THE FEATURE'S INTERPRETATION"
160 PRINT "      BY THE PROCESSOR, OR"
170 PRINT
180 PRINT "   2) REJECT THE PROGRAM WITH AN APPROPRIATE ERROR MESSAGE"
190 PRINT
200 PRINT "SEE THE NBS MINIMAL BASIC TEST PROGRAMS USER'S MANUAL"
210 PRINT "FOR DETAILED CRITERIA."
220 PRINT
230 PRINT "               BEGIN TEST"
240 PRINT
245 PRINT "ABOUT TO COMPUTE: 8+(7-(9-88)/3+(7-9)-3"
250 LET A= 8+(7-(9-88)/3+(7-9)-3
260 PRINT "VALUE ASSIGNED FROM ILLEGAL EXPRESSION = ";A
270 PRINT
280 PRINT "                END TEST"
290 PRINT
300 PRINT "END PROGRAM 36"
310 END
