# Supplementary material
Source: MDPI journal article supplement (https://www.mdpi.com/2073-431X/3/3/69)
Supplement: s1 [file s1 › ./MinimalBASIC/NBS/P037.BAS]

10 PRINT "PROGRAM FILE 37: ERROR - USE OF '**' AS OPERATOR."
20 PRINT "    ANSI STANDARD 7.2"
30 PRINT
40 PRINT "SECTION 37.1: ERROR - USE OF '**' AS OPERATOR."
50 PRINT
60 PRINT "THIS SECTION TESTS WHETHER THE PROCESSOR DETECTS AND REPORTS"
70 PRINT "A NUMERIC EXPRESSION WHICH IS IMPROPERLY FORMED BECAUSE A"
80 PRINT "DOUBLE ASTERISK (**) IS USED AS AN OPERATOR, PRESUMABLY"
90 PRINT "FOR INVOLUTION."
100 PRINT
110 PRINT "THIS IS A TEST FOR A NON-STANDARD FEATURE OF MINIMAL BASIC."
120 PRINT "TO PASS THIS TEST, THE PROCESSOR MUST EITHER:"
130 PRINT
140 PRINT "   1) ACCEPT THE PROGRAM AND BE ACCOMPANIED BY DOCUMENTATION"
150 PRINT "      ACCURATELY DESCRIBING THE FEATURE'S INTERPRETATION"
160 PRINT "      BY THE PROCESSOR, OR"
170 PRINT
180 PRINT "   2) REJECT THE PROGRAM WITH AN APPROPRIATE ERROR MESSAGE"
190 PRINT
200 PRINT "SEE THE NBS MINIMAL BASIC TEST PROGRAMS USER'S MANUAL"
210 PRINT "FOR DETAILED CRITERIA."
220 PRINT
230 PRINT "               BEGIN TEST"
240 PRINT
250 LET A=5**2
260 PRINT "VALUE ASSIGNED FOR 5**2 = ";A
270 PRINT
280 PRINT "                END TEST"
290 PRINT
300 PRINT "END PROGRAM 37"
310 END
