# Supplementary material
Source: MDPI journal article supplement (https://www.mdpi.com/2073-431X/3/3/69)
Supplement: s1 [file s1 › ./MinimalBASIC/NBS/P041.BAS]

10 PRINT "PROGRAM FILE 41: ACCURACY OF MULTIPLICATION"
20 PRINT "    ANSI STANDARD 7.2, 7.4, 7.6"
30 PRINT
40 PRINT "*** NOTE: THIS PROGRAM MAKES USE OF 'READ' AND 'DATA'"
50 PRINT "    WHICH HAVE NOT YET BEEN TESTED. IF SUBSEQUENT TESTS SHOW"
60 PRINT "    THESE FEATURES TO BE INCORRECTLY IMPLEMENTED, THEN THE"
70 PRINT "    VALIDITY OF THE RESULTS OF THIS TEST ROUTINE IS DOUBTFUL."
80 PRINT
100 PRINT "SECTION 41.1 ACCURACY OF MULTIPLICATION."
110 PRINT
120 PRINT "THIS SECTION TESTS THE ACCURACY OF MULTIPLICATION. THE "
130 PRINT "COMPUTED RESULT IS COMPARED WITH A RANGE ESTABLISHED BY"
140 PRINT "PERTURBING EACH OPERAND BY 1 IN ITS 6TH DIGIT. THE RESULT"
150 PRINT "PASSES IF IT FALLS WITHIN THE EXTREME VALUES GENERATED BY"
160 PRINT "THIS PERTURBATION (ACCURATE TO SIX DIGITS)."
220 PRINT
230 PRINT "THIS TEST IS INFORMATIVE ONLY, SINCE THE ANSI STANDARD"
240 PRINT "DOES NOT MANDATE ANY ACCURACY FOR NUMERIC EXPRESSIONS."
250 PRINT
260 PRINT "              BEGIN TEST"
270 PRINT
280 PRINT "FIRST","SECOND","TRUE","COMPUTED","TEST"
290 PRINT "OPERAND","OPERAND","VALUE","VALUE","RESULT"
300 PRINT
310 LET F=0
320 READ A1,A2,T,L,H
330 IF A1=999 THEN 480
335 LET M$="PASS"
340 LET C=A1*A2
350 IF C<L THEN 380
360 IF C>H THEN 380
370 GOTO 400
380 LET M$="FAIL"
390 LET F=F+1
400 PRINT A1,A2,T,C,M$
410 GOTO 320
480 PRINT
490 IF F=0 THEN 520
500 PRINT "*** INFORMATIVE TEST FAILED IN ";F;" CASE(S) ***"
510 GOTO 530
520 PRINT "*** INFORMATIVE TEST PASSED ***"
530 PRINT
540 PRINT "               END TEST"
550 PRINT
560 PRINT "END PROGRAM 41"
2000 DATA 0,0,0,0,0
2010 DATA -3.12345,0,0,0,0
2020 DATA -0,6.68589E37,0,0,0
3000 DATA  0.390625000E+01, 0.524288000E+01, 0.204800000E+02
3010 DATA  0.204798585E+02, 0.204801415E+02
3020 DATA  0.646469000E-10, 0.336466000E+11, 0.217514839E+01
3030 DATA  0.217513355E+01, 0.217516322E+01
3040 DATA  0.646469000E-37, 0.336466000E+38, 0.217514839E+01
3050 DATA  0.217513355E+01, 0.217516322E+01
3060 DATA  0.465728000E+00, 0.447578000E+38, 0.208449607E+38
3070 DATA  0.208448193E+38, 0.208451021E+38
3080 DATA  0.348799000E+01, 0.658589000E+37, 0.229715185E+38
3090 DATA  0.229713677E+38, 0.229716692E+38
3100 DATA  0.448588000E+11, 0.888898000E+27, 0.398748976E+38
3110 DATA  0.398747138E+38, 0.398750814E+38
3120 DATA  0.995855000E+19, 0.944647000E+19, 0.940731438E+38
3130 DATA  0.940728997E+38, 0.940733879E+38
3140 DATA  0.995855000E-19, 0.944647000E-18, 0.940731438E-37
3150 DATA  0.940728997E-37, 0.940733879E-37
3160 DATA  0.995855000E-29, 0.944647000E-08, 0.940731438E-37
3170 DATA  0.940728997E-37, 0.940733879E-37
3180 DATA  0.995855000E-37, 0.944647000E-00, 0.940731438E-37
3190 DATA  0.940728997E-37, 0.940733879E-37
3200 DATA  0.999000000E+00, 0.999000000E+00, 0.998001000E+00
3210 DATA  0.997998502E+00, 0.998003499E+00
3220 DATA  0.774758000E+06, 0.758675000E+06, 0.587789526E+12
3230 DATA  0.587787492E+12, 0.587791560E+12
3240 DATA  0.365341000E+05,-0.338383000E-02,-0.123625184E+03
3250 DATA -0.123626388E+03,-0.123623979E+03
3260 DATA -0.989878000E-01, 0.985342000E-01,-0.975368368E-02
3270 DATA -0.975370844E-02,-0.975365893E-02
3280 DATA -0.228373000E+00,-0.955664000E+03, 0.218247855E+03
3290 DATA  0.218246170E+03, 0.218249539E+03
3300 DATA  0.390625000E+00,-0.248864000E+00,-0.972125000E-01
3310 DATA -0.972131895E-01,-0.972118105E-01
3320 DATA -0.390625000E-29, 0.248864000E+33,-0.972125000E+03
3330 DATA -0.972131895E+03,-0.972118105E+03
5000 DATA 999,0,0,0,0
5010 END
