# Supplementary material
Source: MDPI journal article supplement (https://www.mdpi.com/2073-431X/3/3/69)
Supplement: s1 [file s1 › ./MinimalBASIC/NBS/P043.BAS]

10 PRINT "PROGRAM FILE 43: ACCURACY OF INVOLUTION"
20 PRINT "    ANSI STANDARD 7.2, 7.4, 7.6"
30 PRINT
40 PRINT "*** NOTE: THIS PROGRAM MAKES USE OF 'READ' AND 'DATA'"
50 PRINT "    WHICH HAVE NOT YET BEEN TESTED. IF SUBSEQUENT TESTS SHOW"
60 PRINT "    THESE FEATURES TO BE INCORRECTLY IMPLEMENTED, THEN THE"
70 PRINT "    VALIDITY OF THE RESULTS OF THIS TEST ROUTINE IS DOUBTFUL."
80 PRINT
100 PRINT "SECTION 43.1 ACCURACY OF INVOLUTION."
110 PRINT
120 PRINT "THIS SECTION TESTS THE ACCURACY OF INVOLUTION. THE "
130 PRINT "COMPUTED RESULT IS COMPARED WITH A RANGE ESTABLISHED BY"
140 PRINT "PERTURBING EACH OPERAND BY 1 IN ITS 6TH DIGIT. THE RESULT"
150 PRINT "PASSES IF IT FALLS WITHIN THE EXTREME VALUES GENERATED BY"
160 PRINT "THIS PERTURBATION (ACCURATE TO SIX DIGITS)."
220 PRINT
230 PRINT "THIS TEST IS INFORMATIVE ONLY, SINCE THE ANSI STANDARD"
240 PRINT "DOES NOT MANDATE ANY ACCURACY FOR NUMERIC EXPRESSIONS."
250 PRINT
260 PRINT "              BEGIN TEST"
270 PRINT
280 PRINT "FIRST","SECOND","TRUE","COMPUTED","TEST"
290 PRINT "OPERAND","OPERAND","VALUE","VALUE","RESULT"
300 PRINT
310 LET F=0
320 READ A1,A2,T,L,H
330 IF A1=999 THEN 480
335 LET M$="PASS"
340 LET C=A1^A2
350 IF C<L THEN 380
360 IF C>H THEN 380
370 GOTO 400
380 LET M$="FAIL"
390 LET F=F+1
400 PRINT A1,A2,T,C,M$
410 GOTO 320
480 PRINT
490 IF F=0 THEN 520
500 PRINT "*** INFORMATIVE TEST FAILED IN ";F;" CASE(S) ***"
510 GOTO 530
520 PRINT "*** INFORMATIVE TEST PASSED ***"
530 PRINT
540 PRINT "               END TEST"
550 PRINT
560 PRINT "END PROGRAM 43"
1990 REM TEST X^0=1
2000 DATA -3.46478E33,0,1,1,1
2010 DATA -2.36339E-36,0,1,1,1
2020 DATA 0,0,1,1,1
2030 DATA 3.98475E-37,0,1,1,1
2040 DATA 9.88373E37,0,1,1,1
2045 REM TEST 0^X=0, FOR X>0
2050 DATA 0,3.47474E-33,0,0,0
2060 DATA 0,8.98675E33,0,0,0
2990 REM TEST A^X, A<-1
3000 DATA -0.376354000E+01,-0.440000000E+02, 0.471793993E-25
3010 DATA  0.471738338E-25, 0.471849655E-25
3020 DATA -0.687465000E+01,-0.110000000E+02,-0.616940788E-09
3030 DATA -0.616951160E-09,-0.616930416E-09
3040 DATA -0.736443000E+04,-0.100000000E+01,-0.135787834E-03
3050 DATA -0.135788519E-03,-0.135787149E-03
3060 DATA -0.333874000E+02, 0.100000000E+01,-0.333874000E+02
3070 DATA -0.333875500E+02,-0.333872500E+02
3080 DATA -0.984343000E+03, 0.700000000E+01,-0.895416722E+21
3090 DATA -0.895423590E+21,-0.895409854E+21
3100 DATA -0.336353000E+01, 0.120000000E+02, 0.209673559E+07
3110 DATA  0.209665578E+07, 0.209681540E+07
3115 REM TEST -1^X
3120 DATA -0.100000000E+01,-0.330000000E+02,-0.100000000E+01
3130 DATA -0.100033506E+01,-0.999669556E+00
3140 DATA -0.100000000E+01,-0.600000000E+01, 0.100000000E+01
3150 DATA  0.999939502E+00, 0.100006501E+01
3160 DATA -0.100000000E+01,-0.100000000E+01,-0.100000000E+01
3170 DATA -0.100001501E+01,-0.999989500E+00
3180 DATA -0.100000000E+01, 0.100000000E+01,-0.100000000E+01
3190 DATA -0.100001500E+01,-0.999989500E+00
3200 DATA -0.100000000E+01, 0.800000000E+01, 0.100000000E+01
3210 DATA  0.999919502E+00, 0.100008501E+01
3220 DATA -0.100000000E+01, 0.900000000E+01,-0.10000000E+01
3230 DATA -0.100009501E+01,-0.999909503E+00
3235 REM TEST A^X, 01<A<0
3240 DATA -0.474653000E+00,-0.220000000E+02, 0.131741601E+08
3250 DATA  0.131734994E+08, 0.131748208E+08
3260 DATA -0.225242000E-02, 0.300000000E+01,-0.114274183E-07
3270 DATA -0.114276205E-07,-0.114272160E-07
3280 DATA -0.534278000E-04, 0.600000000E+01, 0.232596807E-25
3290 DATA  0.232593695E-25, 0.232599920E-25
3300 DATA -0.272625000E+00, 0.900000000E+01,-0.831938279E-05
3310 DATA -0.831966244E-05,-0.831910314E-05
3315 REM TEST A^X,  0<A<1
3320 DATA  0.363544000E+00,-0.363353000E+02, 0.927457281E+16
3330 DATA  0.927270258E+16, 0.927644343E+16
3340 DATA  0.463542000E-02,-0.100000000E+01, 0.215730182E+03
3350 DATA  0.215717623E+03, 0.215742742E+03
3380 DATA  0.298746000E-04,-0.263545000E-02, 0.102783787E+01
3390 DATA  0.102783275E+01, 0.102784299E+01
3400 DATA  0.226399000E+00, 0.847574000E+00, 0.283928118E+00
3410 DATA  0.283926132E+00, 0.283930103E+00
3420 DATA  0.998476000E-01, 0.100000000E+01, 0.998476000E-01
3430 DATA  0.998451494E-01, 0.998500507E-01
3440 DATA  0.974653000E-01, 0.143654000E+02, 0.298144041E-14
3450 DATA  0.298069739E-14, 0.298218360E-14
3455 REM TEST 1^X
3460 DATA  0.100000000E+01,-0.222222000E+02, 0.100000000E+01
3470 DATA  0.999777302E+00, 0.100022725E+01
3480 DATA  0.100000000E+01,-0.464533000E-01, 0.100000000E+01
3490 DATA  0.999999035E+00, 0.100000547E+01
3500 DATA  0.100000000E+01, 0.993764000E-01, 0.100000000E+01
3510 DATA  0.999998506E+00, 0.100000600E+01
3520 DATA  0.100000000E+01, 0.187564000E+02, 0.100000000E+01
3530 DATA  0.999811951E+00, 0.100019259E+01
3535 REM TEST A^X, A>1
3540 DATA  0.847447000E+03,-0.985743000E+01, 0.136878595E-28
3550 DATA  0.136867274E-28, 0.136889917E-28
3560 DATA  0.228398000E+01,-0.937362000E+00, 0.461079137E+00
3570 DATA  0.461076363E+00, 0.461081910E+00
3580 DATA  0.933847000E+02, 0.928273000E-01, 0.152368565E+01
3590 DATA  0.152367980E+01, 0.152369149E+01
3600 DATA  0.837363000E+09, 0.298383000E+01, 0.421170346E+27
3610 DATA  0.421081821E+27, 0.421258889E+27
3615 REM TEST A^X, WHERE ABS(A) IS CLOSE TO 1, X IS LARGE
3620 DATA  0.999988000E+00, 0.958576000E+06, 0.100999405E-04
3630 DATA  0.387260445E-05, 0.2634107E8E-04
3640 DATA -0.999982000E+00, 0.947563000E+06,-0.391334786E-07
3650 DATA -0.100943693E-06,-0.151711334E-07
3660 DATA -0.999937000E+00, 0.976352000E+06, 0.193031627E-26
3670 DATA  0.727071227E-27, 0.512483260E-26
3680 DATA  0.100002000E+01, 0.209746500E+07, 0.165259840E+19
3690 DATA  0.128553554E+10, 0.212444587E+28
3700 DATA -0.100005000E+01, 0.353533000E+06,-0.474984719E+08
3710 DATA -0.162918665E+10,-0.138475470E+07
3720 DATA -0.100005000E+01, 0.958572000E+06, 0.652538506E+21
3730 DATA  0.448505410E+17, 0.949298339E+25
3735 REM TEST A^X, WHERE A^X CLOSE TO LIMITS OF 1E38, 1E-38
3740 DATA  0.576352000E+00, 0.111000000E+03, 0.273115473E-26
3750 DATA  0.272911951E-26, 0.273319144E-26
3760 DATA  0.578746000E+00,-0.145432000E+03, 0.348212882E+35
3770 DATA  0.347934556E+35, 0.348491430E+35
3780 DATA  0.227364000E+01, 0.944756000E+02, 0.502917503E+34
3790 DATA  0.502666781E+34, 0.503168349E+34
3792 DATA  0.233333000E+01,-0.991234000E+02, 0.334927971E-36
3795 DATA  0.334752354E-36, 0.335103676E-36
3799 REM TEST A^X, WHERE A IS CLOSE TO LIMITS OF 1E38, 1E-38
3800 DATA  0.558574000E+38, 0.976453000E-03, 0.108857473E+01
3810 DATA  0.108856963E+01, 0.108857984E+01
3820 DATA  0.576363000E-29, 0.172728000E-01, 0.312575800E+00
3830 DATA  0.312573186E+00, 0.312578414E+00
3840 DATA  0.333737000E+34,-0.953423000E-01, 0.636504568E-03
3850 DATA  0.636498972E-03, 0.636510163E-03
3860 DATA  0.623147000E-37,-0.936218000E-02, 0.223009693E+01
3870 DATA  0.223004499E+01, 0.223014888E+01
5000 DATA 999,0,0,0,0
5010 END
