# Supplementary material
Source: MDPI journal article supplement (https://www.mdpi.com/2073-431X/3/3/69)
Supplement: s1 [file s1 › ./MinimalBASIC/NBS/P052.BAS]

10 PRINT "PROGRAM FILE 52: ERROR -MISMATCHED CONTROL-VARIABLES ON"
15 PRINT "        FOR-STATEMENT AND NEXT-STATEMENT."
20 PRINT "    ANSI STANDARD 11.4"
30 PRINT
40 PRINT "SECTION 52.1: ERROR - MISMATCHED CONTROL-VARIABLES ON"
50 PRINT "        FOR-STATEMENT AND NEXT-STATEMENT."
60 PRINT
70 PRINT "THIS IS A TEST FOR A NON-STANDARD FEATURE OF MINIMAL BASIC."
80 PRINT "TO PASS THIS TEST, THE PROCESSOR MUST EITHER:"
90 PRINT
100 PRINT "   1) ACCEPT THE PROGRAM AND BE ACCOMPANIED BY DOCUMENTATION"
110 PRINT "      ACCURATELY DESCRIBING THE FEATURE'S INTERPRETATION"
120 PRINT "      BY THE PROCESSOR, OR"
130 PRINT
140 PRINT "   2) REJECT THE PROGRAM WITH AN APPROPRIATE ERROR MESSAGE"
150 PRINT
160 PRINT "SEE THE NBS MINIMAL BASIC TEST PROGRAMS USER'S MANUAL"
170 PRINT "FOR DETAILED CRITERIA."
180 PRINT
190 PRINT "                               BEGIN TEST."
200 PRINT
210 PRINT "ENTERING FOR-BLOCK; LOOP IS: FOR I=1 TO 5 ... NEXT J"
220 FOR I=1 TO 5
230 PRINT "I = ";I;"       J = ";J
240 NEXT J
270 PRINT
280 PRINT "                                END TEST."
290 PRINT
300 PRINT "END PROGRAM 52"
310 END
