# Supplementary material
Source: MDPI journal article supplement (https://www.mdpi.com/2073-431X/3/3/69)
Supplement: s1 [file s1 › ./MinimalBASIC/NBS/P059.BAS]

10 PRINT "PROGRAM FILE 59: ARRAY NAMED 'A' IS DISTINCT FROM 'A$'."
20 PRINT "    ANSI STANDARD 6.2, 6.4"
30 PRINT
40 PRINT "SECTION 59.1:  ARRAY NAMED 'A' IS DISTINCT FROM 'A$'."
50 PRINT
60 PRINT "                    BEGIN TEST"
70 PRINT
80 FOR J=0 TO 10
90 LET A(J)=11-J
100 NEXT J
110 LET E9=0
120 LET A$="OK"
130 FOR I=10 TO 0 STEP -1
140   IF A(I)=11-I THEN 170
150   LET E9=1
160   PRINT "LOST CORRECT VALUE IN ARRAY ELEMENT #";I
170 NEXT I
180 IF A$="OK" THEN 210
190 PRINT "LOST CORRECT VALUE IN A$"
200 LET E9=1
210 PRINT
220 IF E9<>0 THEN 250
230 PRINT "***  TEST PASSED  ***"
240 GOTO 260
250 PRINT "***  TEST FAILED  ***"
260 PRINT
270 PRINT "                    END TEST"
280 PRINT
290 PRINT "END PROGRAM 59"
340 END
