# Supplementary material
Source: MDPI journal article supplement (https://www.mdpi.com/2073-431X/3/3/69)
Supplement: s1 [file s1 › ./MinimalBASIC/NBS/P063.BAS]

10 PRINT "PROGRAM FILE 63: EXCEPTION - SUBSCRIPT TOO LARGE FOR"
15 PRINT "        ONE-DIMENSIONAL ARRAY."
20 PRINT "    ANSI STANDARD 6.5"
30 PRINT
40 PRINT "SECTION 63.1: EXCEPTION - SUBSCRIPT TOO LARGE FOR"
50 PRINT "        ONE-DIMENSIONAL ARRAY."
60 PRINT
70 PRINT "THE OBJECT OF THIS TEST IS TO SEE WHETHER THE PROCESSOR"
80 PRINT "RECOGNIZES A FATAL EXCEPTION WHEN A SUBSCRIPT EXCEEDS"
90 PRINT "THE IMPLICIT UPPER BOUND OF AN ARRAY."
100 PRINT
110 PRINT "TO PASS THIS TEST:"
120 PRINT
130 PRINT "    1) A MESSAGE IDENTIFYING THE EXCEPTION MUST BE"
140 PRINT "       DISPLAYED, AND"
150 PRINT
160 PRINT "    2) THE PROGRAM MUST TERMINATE UPON USE OF THE ILLEGAL"
170 PRINT "       SUBSCRIPT."
180 PRINT
190 PRINT "                               BEGIN TEST."
200 PRINT
210 FOR I=7 TO 12
220   PRINT "ABOUT TO ASSIGN TO A(";I;"). ";
230   IF I<11 THEN 260
240   PRINT "*** EXCEPTION SHOULD OCCUR NOW ***"
250   GOTO 270
260   PRINT "ASSIGNMENT SHOULD BE OK."
270   LET A(I) = 20 - I
280   PRINT "HAVE ASSIGNED ";20-I;" TO A(";I;")."
290   IF I<11 THEN 310
300   PRINT "ASSIGNMENT TO SUBSCRIPT > 10 - *** TEST FAILS ***"
310   PRINT
320 NEXT I
330 PRINT
340 PRINT "                               END TEST."
350 PRINT
360 PRINT "END PROGRAM 63"
370 END
