# Supplementary material
Source: MDPI journal article supplement (https://www.mdpi.com/2073-431X/3/3/69)
Supplement: s1 [file s1 › ./MinimalBASIC/NBS/P067.BAS]

10 PRINT "PROGRAM FILE 67: EXCEPTION - SUBSCRIPT TOO SMALL FOR"
15 PRINT "        ONE-DIMENSIONAL ARRAY, WITH OPTION BASE 1."
20 PRINT "    ANSI STANDARD 6.5, 15.2, 15.4"
30 PRINT
40 PRINT "SECTION 67.1: EXCEPTION - SUBSCRIPT TOO SMALL FOR"
50 PRINT "        ONE-DIMENSIONAL ARRAY, WITH OPTION BASE 1."
60 PRINT
70 PRINT "THE OBJECT OF THIS TEST IS TO SEE WHETHER THE PROCESSOR"
80 PRINT "RECOGNIZES USE OF A ZERO SUBSCRIPT AS A FATAL EXCEPTION WHEN"
90 PRINT "OPTION BASE 1 HAS BEEN SPECIFIED."
100 PRINT
110 PRINT "TO PASS THIS TEST:"
120 PRINT
130 PRINT "    1) A MESSAGE IDENTIFYING THE EXCEPTION MUST BE"
140 PRINT "       DISPLAYED, AND"
150 PRINT
160 PRINT "    2) THE PROGRAM MUST TERMINATE UPON USE OF THE ZERO"
170 PRINT "       SUBSCRIPT."
180 PRINT
190 PRINT "                              BEGIN TEST."
200 PRINT
210 OPTION BASE 1
220 FOR I=3 TO -2 STEP -1
230   PRINT "ABOUT TO ASSIGN TO A(";I;").";
240   IF I>0 THEN 270
250   PRINT "*** EXCEPTION SHOULD OCCUR NOW ***"
260   GOTO 280
270   PRINT " ASSIGNMENT SHOULD BE OK."
280   LET A(I) = 20 - I
290   PRINT "HAVE ASSIGNED ";20-I;" TO A(";I;")."
300   IF I>0 THEN 320
310   PRINT "ASSIGNMENT TO SUBSCRIPT < 1 - *** TEST FAILS ***"
320   PRINT
330 NEXT I
340 PRINT
350 PRINT "                                END TEST."
360 PRINT
370 PRINT "END PROGRAM 67"
380 END
