# Supplementary material
Source: MDPI journal article supplement (https://www.mdpi.com/2073-431X/3/3/69)
Supplement: s1 [file s1 › ./MinimalBASIC/NBS/P082.BAS]

10 PRINT "PROGRAM FILE 82: ERROR - ARRAY-REFERENCE PRECEDES"
20 PRINT "        OPTION-STATEMENT."
30 PRINT "    ANSI STANDARD 15.4"
40 PRINT
50 PRINT "SECTION 82.1: ERROR - ARRAY-REFERENCE PRECEDES"
60 PRINT "        OPTION-STATEMENT."
70 PRINT
80 PRINT "THIS IS A TEST FOR A NON-STANDARD FEATURE OF MINIMAL BASIC."
90 PRINT "TO PASS THIS TEST, THE PROCESSOR MUST EITHER:"
100 PRINT
110 PRINT "   1) ACCEPT THE PROGRAM AND BE ACCOMPANIED BY DOCUMENTATION"
120 PRINT "      ACCURATELY DESCRIBING THE FEATURE'S INTERPRETATION"
130 PRINT "      BY THE PROCESSOR, OR"
140 PRINT
150 PRINT "   2) REJECT THE PROGRAM WITH AN APPROPRIATE ERROR MESSAGE"
160 PRINT
170 PRINT "SEE THE NBS MINIMAL BASIC TEST PROGRAMS USER'S MANUAL"
180 PRINT "FOR DETAILED CRITERIA."
190 PRINT
200 PRINT "               BEGIN TEST"
210 PRINT
220 PRINT "ABOUT TO EXECUTE 'LET A(0) = 105'"
230 PRINT "'OPTION BASE 1' FOLLOWS THIS STATEMENT."
240 LET A(0) = 105
250 OPTION BASE 1
260 PRINT
270 PRINT "A(0) = ";A(0)
280 PRINT
290 PRINT "               END TEST"
300 PRINT
310 PRINT "END PROGRAM 82"
320 END
