# Supplementary material
Source: MDPI journal article supplement (https://www.mdpi.com/2073-431X/3/3/69)
Supplement: s1 [file s1 › ./MinimalBASIC/NBS/P091.BAS]

10 PRINT "PROGRAM FILE 91: ERROR - TRANSFER TO NON-EXISTING LINE"
15 PRINT "        NUMBER USING THE ON-GOTO-STATEMENT."
20 PRINT "    ANSI STANDARD 10.4"
30 PRINT
40 PRINT "SECTION 91.1: ERROR - TRANSFER TO NON-EXISTING LINE"
50 PRINT "        NUMBER USING THE ON-GOTO-STATEMENT."
60 PRINT
70 PRINT "THIS IS A TEST FOR A NON-STANDARD FEATURE OF MINIMAL BASIC."
80 PRINT "TO PASS THIS TEST, THE PROCESSOR MUST EITHER:"
90 PRINT
100 PRINT "   1) ACCEPT THE PROGRAM AND BE ACCOMPANIED BY DOCUMENTATION"
110 PRINT "      ACCURATELY DESCRIBING THE FEATURE'S INTERPRETATION"
120 PRINT "      BY THE PROCESSOR, OR"
130 PRINT
140 PRINT "   2) REJECT THE PROGRAM WITH AN APPROPRIATE ERROR MESSAGE"
150 PRINT
160 PRINT "SEE THE NBS MINIMAL BASIC TEST PROGRAMS USER'S MANUAL"
170 PRINT "FOR DETAILED CRITERIA."
180 PRINT
190 PRINT "                               BEGIN TEST."
200 PRINT
230 LET A$="LINE 300."
240 LET X=1
250 ON X GOTO 295
260 PRINT "CONTROL FELL THROUGH THE ON-GOTO STATEMENT."
280 GOTO 310
290 LET A$="LINE 290."
300 PRINT "'ON X GOTO 295' JUMPED TO ";A$
310 PRINT
320 PRINT "                                 END TEST."
330 PRINT
340 PRINT "END PROGRAM 91."
350 END
