# Supplementary material
Source: MDPI journal article supplement (https://www.mdpi.com/2073-431X/3/3/69)
Supplement: s1 [file s1 › ./MinimalBASIC/NBS/P092.BAS]

10 PRINT "PROGRAM FILE 92: READ AND DATA STATEMENTS FOR NUMERIC DATA."
20 PRINT "    ANSI STANDARD 5.2, 14.2, 14.4"
30 PRINT
40 PRINT "SECTION 92.1: READ AND DATA STATEMENTS FOR NUMERIC DATA."
50 PRINT
60 PRINT "THIS SECTION TESTS THE PROCESSOR'S CAPABILITY TO HANDLE"
70 PRINT "INTERNAL NUMERIC DATA USING THE DATA AND READ STATEMENTS."
80 PRINT "THE DATA-VALUES WILL BE COMPARED TO THOSE ASSIGNED TO AN"
90 PRINT "ARRAY AND THE RESULTS DISPLAYED. IF THE ACCURACY IS LESS"
120 PRINT "THAN SIX DIGITS, THE TEST WILL BE COUNTED AS A FAILURE."
130 PRINT
132 PRINT "                BEGIN TEST"
134 PRINT
138 DIM A(110)
140 LET A(1)=9.99998E37
145 LET A(2)=1E38
150 LET A(3)=-1E38
155 LET A(4)=-9.99998E37
160 LET A(5)=9.87653E37
165 LET A(6)=9.87655E37
170 LET A(7)=9.87653E-38
175 LET A(8)=9.87655E-38
180 LET A(9)=1.00000E-38
185 LET A(10)=1.00002E-38
190 LET A(11)=-1.00002E-38
195 LET A(12)=-1.00000E-38
200 LET A(13)=9.99998E-38
205 LET A(14)=10E-38
210 LET A(15)=123.455
215 LET A(16)=123.457
220 LET A(17)=123.455
225 LET A(18)=123.457
230 LET A(19)=9.87653E37
235 LET A(20)=9.87655E37
240 LET A(21)=123455
245 LET A(22)=123457
250 LET A(23)=123455
255 LET A(24)=123457
260 LET A(25)=123455
265 LET A(26)=123457
270 LET A(27)=987.653
275 LET A(28)=987.655
280 LET A(29)=1.23455E+6
285 LET A(30)=1.23457E+6
290 LET A(31)=1.23455E+8
295 LET A(32)=1.23457E+8
300 LET A(33)=1.23455E-2
305 LET A(34)=1.23457E-2
310 LET A(35)=1.23455E-4
315 LET A(36)=1.23457E-4
320 LET A(37)=.119999
325 LET A(38)=.120001
330 LET A(39)=.119999
335 LET A(40)=.120001
340 LET A(41)=-.120001
345 LET A(42)=-.119999
350 LET A(43)=.119999
355 LET A(44)=.120001
360 LET A(45)=0
365 LET A(46)=0
370 LET A(47)=0
375 LET A(48)=0
380 LET A(49)=0
385 LET A(50)=0
390 LET A(51)=1.22999E9
395 LET A(52)=1.23001E9
400 LET A(53)=1.22999E9
405 LET A(54)=1.23001E9
410 LET A(55)=1.22999E9
415 LET A(56)=1.23001E9
420 LET A(57)=1.22999E-9
425 LET A(58)=1.23001E-9
430 LET A(59)=1.22999E-9
435 LET A(60)=1.23001E-9
440 LET A(61)=1.22999E-9
445 LET A(62)=1.23001E-9
450 LET A(63)=1.22999E-9
455 LET A(64)=1.23001E-9
460 LET A(65)=0
465 LET A(66)=0
470 LET A(67)=0
475 LET A(68)=0
480 LET A(69)=0
485 LET A(70)=0
490 LET A(71)=0
495 LET A(72)=0
500 LET A(73)=122.999
505 LET A(74)=123.001
510 LET A(75)=122.999
515 LET A(76)=123.001
520 LET A(77)=122.999
525 LET A(78)=123.001
530 LET A(79)=122.999
535 LET A(80)=123.001
540 LET A(81)=1.2345578E19
545 LET A(82)=1.2345779E19
550 LET A(83)=1.23455E15
555 LET A(84)=1.23457E15
560 LET A(85)=1.23455E-15
565 LET A(86)=1.23457E-15
570 LET A(87)=123455
575 LET A(88)=123457
580 LET A(89)=123455
585 LET A(90)=123457
1000 LET I=-1
1001 LET J=0
1002 PRINT "TRAIL #","DATA VALUE","RESULTS"
1005 LET F=0
1010 READ X
1020 IF X=-1 THEN 5000
1025 LET J=J+1
1030 LET I=I+2
1035 LET K=I+1
1040 IF X<A(I) THEN 1100
1050 IF X>A(K) THEN 1100
1060 PRINT J,X," OK "
1070 GOTO 1010
1100 PRINT J,X,"FAIL"
1110 LET F=F+1
1120 GOTO 1010
4000 DATA +.999999E38,-.999999E38,.00987654E40,987.654E-40
4010 DATA +1.00001E-38,-1.00001E-38,9.99999E-38
4015 DATA 123456.E-3,.123456E3
4020 DATA 9.87654E37,123456,123456.,123456.0,987.654
4030 DATA 1234560,123456000,.0123456,.000123456
4040 DATA .12,+.12,-.12,0.12
4050 DATA 0.0,+0,-.000
4060 DATA 1.23E9,1.23E09,1.23E+9,1.23E-9,1.23E-09,1.23E-0009
4070 DATA 000001.2300000E-000009,0E0,000.000E22,+000E55,0.0E-000
4080 DATA 123E0,123E000,123E-00,123E+0
4090 DATA 12345678901234567890,123456E10,0.0000123456E-10
4100 DATA 123456000000000E-9,0.000000000123456E15
4900 DATA -1
5000 PRINT
5010 IF F=0 THEN 5050
5020 PRINT "***** TEST FAILED ***** ";F;" CASE(S) HANDLED IMPROPERLY."
5030 GOTO 5100
5050 PRINT "***** TEST PASSED *****"
5100 PRINT
5110 PRINT "                  END TEST"
5120 PRINT
5130 PRINT "END PROGRAM 92"
5140 END
