# Supplementary material
Source: MDPI journal article supplement (https://www.mdpi.com/2073-431X/3/3/69)
Supplement: s1 [file s1 › ./MinimalBASIC/NBS/P117.BAS]

10 PRINT "PROGRAM FILE 117: ACCURACY OF SQR FUNCTION."
20 PRINT "    ANSI STANDARD 7.6, 8.4"
30 PRINT
40 PRINT "SECTION 117.1: ACCURACY OF SQR FUNCTION."
50 PRINT
60 PRINT "THIS PROGRAM TESTS VALUES RETURNED BY INVOCATIONS OF THE"
70 PRINT "SQR FUNCTION FOR ACCURACY. THE INVOCATION MUST RETURN,"
80 PRINT "ACCURATE TO SIX DIGITS, SOME VALUE ACTUALLY TAKEN ON BY"
90 PRINT "THE FUNCTION WITHIN A DOMAIN BOUNDED BY THE ACTUAL ARGUMENT"
100 PRINT "PLUS OR MINUS ONE IN THE SIXTH DIGIT. ALSO, AN"
110 PRINT "'ERROR MEASURE' IS COMPUTED AND REPORTED. THIS MEASURE"
120 PRINT "IS JUST 2 * THE ABSOLUTE ERROR OVER THE SIZE OF THE RANGE;"
130 PRINT "THUS, A VALUE JUST BARELY PASSING OR FAILING WILL USUALLY"
140 PRINT "HAVE A MEASURE OF ABOUT 1. A VALUE 3 TIMES"
150 PRINT "AS INACCURATE AS EXPECTED WILL HAVE A MEASURE OF 3."
160 PRINT
170 PRINT "THIS TEST IS INFORMATIVE ONLY, SINCE THE ANSI STANDARD"
180 PRINT "DOES NOT MANDATE ANY ACCURACY FOR SUPPLIED-FUNCTIONS."
190 PRINT
200 PRINT "              BEGIN TEST"
210 PRINT
220 PRINT "ARGUMENT","TRUE","COMPUTED","ERROR","OUTCOME"
230 PRINT " ","VALUE","VALUE","MEASURE"
240 PRINT
250 LET F=0
260 READ A,T,L,H
270 IF A=999 THEN 2000
280 LET C=SQR(A)
290 IF C=T THEN 333
300 IF C<L THEN 444
310 IF C>H THEN 444
320 LET O$=" OK "
330 GOTO 500
333 LET O$=" OK  - EXACT"
340 GOTO 500
444 LET O$="FAIL"
445 LET F=F+1
450 GOTO 500
500 LET R=H-L
510 IF R=0 THEN 700
520 LET E=ABS((C-T)/R)
525 LET E=E+E
530 PRINT A,T,C,E,O$
540 GOTO 260
700 PRINT A,T,C,"RANGE ZERO",O$
710 GOTO 260
2000 PRINT
2010 IF F=0 THEN 2100
2020 PRINT "*** INFORMATIVE TEST FAILED IN ";F;" CASE(S) ***"
2030 GOTO 2110
2100 PRINT "*** INFORMATIVE TEST PASSED ***"
2110 PRINT
2120 PRINT "               END TEST"
2130 PRINT
2140 PRINT "END PROGRAM 117"
2990 DATA 0,0,0,0
3000 DATA  1.000000000E-38, 0.100000000E-18
3010 DATA  0.999994499E-19, 0.100001000E-18
3040 DATA  0.999999000E-37, 0.316227608E-18
3050 DATA  0.316226949E-18, 0.316228267E-18
3052 DATA  0.900000000E-37, 0.300000000E-18
3055 DATA  0.299999333E-18, 0.300000667E-18
3060 DATA  0.999999000E-36, 0.999999500E-18
3070 DATA  0.999998499E-18, 0.100000500E-17
3080 DATA  0.999999000E-30, 0.999999500E-15
3090 DATA  0.999998499E-15, 1.000000500E-15
3100 DATA  0.123456000E-19, 0.111110756E-09
3110 DATA  0.111109805E-09, 0.111111706E-09
3120 DATA  0.654321000E-04, 0.808901106E-02
3130 DATA  0.808899988E-02, 0.808902225E-02
3140 DATA  0.500000000E+00, 0.707106781E+00
3150 DATA  0.707105574E+00, 0.707107989E+00
3160 DATA  0.100000000E+01, 0.100000000E+01
3170 DATA  0.999994499E+00, 0.100001000E+01
3180 DATA  0.999999000E+00, 0.999999500E+00
3190 DATA  0.999998499E+00, 0.100000500E+01
3200 DATA  0.200000000E+01, 0.141421356E+01
3210 DATA  0.141420502E+01, 0.141422210E+01
3220 DATA  0.300000000E+01, 0.173205081E+01
3230 DATA  0.173204292E+01, 0.173205870E+01
3240 DATA  0.400000000E+01, 0.200000000E+01
3250 DATA  0.199999249E+01, 0.200000750E+01
3260 DATA  0.500000000E+01, 0.223606798E+01
3270 DATA  0.223606074E+01, 0.223607522E+01
3280 DATA  0.999999000E+01, 0.316227608E+01
3290 DATA  0.316226949E+01, 0.316228267E+01
3300 DATA  0.100000000E+02, 0.316227766E+01
3310 DATA  0.316225684E+01, 0.316229848E+01
3320 DATA  0.400000000E+05, 0.200000000E+03
3330 DATA  0.199999249E+03, 0.200000750E+03
3340 DATA  0.123456000E+09, 0.111110756E+05
3350 DATA  0.111109805E+05, 0.111111706E+05
3360 DATA  0.654321000E+21, 0.255796990E+11
3370 DATA  0.255796294E+11, 0.255797686E+11
3380 DATA  0.999999000E+32, 0.999999500E+16
3390 DATA  0.999998499E+16, 1.000000500E+16
3392 DATA  0.900000000E+37, 0.300000000E+19
3394 DATA  0.299999333E+19, 0.300000667E+19
3400 DATA  0.100000000E+39, 1.000000000E+19
3410 DATA  0.999994499E+19, 0.100001000E+20
9000 DATA 999,0,0,0
9400 END
