# Supplementary material
Source: MDPI journal article supplement (https://www.mdpi.com/2073-431X/3/3/69)
Supplement: s1 [file s1 › ./MinimalBASIC/NBS/P149.BAS]

10 PRINT "PROGRAM FILE 149: ERROR - NULL ARGUMENT-LIST FOR"
15 PRINT "        RND FUNCTION."
20 PRINT "    ANSI STANDARD 7.2, 7.4, 8.2, 8.4"
30 PRINT
40 PRINT "SECTION 149.1: ERROR - NULL ARGUMENT-LIST FOR"
45 PRINT "        RND FUNCTION."
50 PRINT
60 PRINT "THIS SECTION TESTS WHAT HAPPENS WHEN THE RND FUNCTION IS"
70 PRINT "INVOKED WITH A NULL ARGUMENT-LIST."
90 PRINT
100 PRINT "THIS IS A TEST FOR A NON-STANDARD FEATURE OF MINIMAL BASIC."
110 PRINT "TO PASS THIS TEST, THE PROCESSOR MUST EITHER:"
120 PRINT
130 PRINT "   1) ACCEPT THE PROGRAM AND BE ACCOMPANIED BY DOCUMENTATION"
140 PRINT "      ACCURATELY DESCRIBING THE FEATURE'S INTERPRETATION"
150 PRINT "      BY THE PROCESSOR, OR"
160 PRINT
170 PRINT "   2) REJECT THE PROGRAM WITH AN APPROPRIATE ERROR MESSAGE"
180 PRINT
190 PRINT "SEE THE NBS MINIMAL BASIC TEST PROGRAMS USER'S MANUAL"
200 PRINT "FOR DETAILED CRITERIA."
210 PRINT
220 PRINT "             BEGIN TEST"
230 PRINT
240 PRINT "ABOUT TO ATTEMPT INVOCATION OF RND."
250 LET A=RND()
260 PRINT "PROCESSOR HAS EVALUATED RND() = ";A
270 PRINT
280 PRINT "              END TEST"
290 PRINT
300 PRINT "END PROGRAM 149"
310 END
