# Supplementary material
Source: MDPI journal article supplement (https://www.mdpi.com/2073-431X/3/3/69)
Supplement: s1 [file s1 › ./MinimalBASIC/NBS/P173.BAS]

10 PRINT "PROGRAM FILE 173: EXCEPTION - NEGATIVE QUANTITY RAISED TO"
20 PRINT "        A NON-INTEGRAL POWER IN TAB-ITEM."
30 PRINT "    ANSI STANDARD 7.5, 12.2"
40 PRINT
50 PRINT "SECTION 173.1: EXCEPTION - NEGATIVE QUANTITY RAISED TO"
55 PRINT "        A NON-INTEGRAL POWER IN TAB-ITEM."
60 PRINT
70 PRINT "TO PASS THIS TEST:"
80 PRINT
90 PRINT "    1) A MESSAGE IDENTIFYING THE EXCEPTION MUST BE"
100 PRINT "       DISPLAYED, AND"
110 PRINT
120 PRINT "    2) EXECUTION MUST TERMINATE"
130 PRINT
140 PRINT "               BEGIN TEST."
150 PRINT
160 PRINT "ABOUT TO EXECUTE:"
170 PRINT "   PRINT A$;TAB((-3) ^ 1.99999);B$"
190 PRINT "   (WHERE A$ = '111' AND B$ = '222')"
195 PRINT
200 LET A$="111"
210 LET B$="222"
220 LET C=-3
225 LET D=1.99999
230 PRINT A$;TAB(C^D);B$
240 PRINT
250 PRINT "*** TEST FAILED: EXECUTION DID NOT TERMINATE. ***"
260 PRINT
270 PRINT "                END TEST."
280 PRINT
290 PRINT "END PROGRAM 173."
300 END
