# Supplementary material
Source: MDPI journal article supplement (https://www.mdpi.com/2073-431X/3/3/69)
Supplement: s1 [file s1 › ./MinimalBASIC/NBS/P176.BAS]

10 PRINT "PROGRAM FILE 176: EXCEPTION - NEGATIVE QUANTITY RAISED TO"
20 PRINT "        A NON-INTEGRAL POWER IN IF-STATEMENT."
30 PRINT "    ANSI STANDARD 7.5, 10.2"
40 PRINT
50 PRINT "SECTION 176.1: EXCEPTION - NEGATIVE QUANTITY RAISED TO"
60 PRINT "        A NON-INTEGRAL POWER IN IF-STATEMENT."
70 PRINT
80 PRINT "TO PASS THIS TEST:"
90 PRINT
100 PRINT "    1) A MESSAGE IDENTIFYING THE EXCEPTION MUST BE"
110 PRINT "       DISPLAYED, AND"
120 PRINT
130 PRINT "    2) EXECUTION MUST TERMINATE"
140 PRINT
150 PRINT "                BEGIN TEST."
160 PRINT
170 PRINT "ABOUT TO EXECUTE:"
180 PRINT "   IF (-3) ^ 3.00001 < 0 ..."
190 PRINT
210 LET B=3.00001
220 LET A=-3
230 IF A^B < 0 THEN 260
240 PRINT "IF-STATEMENT TESTED FALSE."
250 GOTO 270
260 PRINT "IF-STATEMENT TESTED TRUE."
270 PRINT
320 PRINT "*** TEST FAILED: EXECUTION DID NOT TERMINATE. ***"
330 PRINT
340 PRINT "                END TEST."
350 PRINT
360 PRINT "END PROGRAM 176."
370 END
