# Supplementary material
Source: MDPI journal article supplement (https://www.mdpi.com/2073-431X/3/3/69)
Supplement: s1 [file s1 › ./MinimalBASIC/NBS/P192.BAS]

10 PRINT "PROGRAM FILE 192: ERROR - PRINT-ITEM QUOTED STRINGS"
15 PRINT "        CONTAINING SINGLE QUOTE."
20 PRINT "    ANSI STANDARD 3.2, 12.2, 12.4"
30 PRINT
40 PRINT "SECTION 192.1: ERROR - PRINT-ITEM QUOTED STRINGS"
45 PRINT "        CONTAINING SINGLE QUOTE."
50 PRINT
60 PRINT "THIS PROGRAM TESTS TO SEE IF THE PROCESSOR ACCEPTS PROGRAMS"
70 PRINT "CONTAINING A SINGLE OCCURRENCE OF THE QUOTE CHARACTER WITHIN"
80 PRINT "THE QUOTED STRING OF A PRINT-STATEMENT."
90 PRINT
100 PRINT "THIS IS A TEST FOR A NON-STANDARD FEATURE OF MINIMAL BASIC."
110 PRINT "TO PASS THIS TEST, THE PROCESSOR MUST EITHER:"
120 PRINT
130 PRINT "   1) ACCEPT THE PROGRAM AND BE ACCOMPANIED BY DOCUMENTATION"
140 PRINT "      ACCURATELY DESCRIBING THE FEATURE'S INTERPRETATION"
150 PRINT "      BY THE PROCESSOR, OR"
160 PRINT
170 PRINT "   2) REJECT THE PROGRAM WITH AN APPROPRIATE ERROR MESSAGE"
180 PRINT
190 PRINT "SEE THE NBS MINIMAL BASIC TEST PROGRAMS USER'S MANUAL"
200 PRINT "FOR DETAILED CRITERIA."
210 PRINT
220 PRINT "                              BEGIN TEST."
230 PRINT
240 PRINT "A PRINT-ITEM CONTAINING AN ASTERISK, A SINGLE "
250 PRINT "OCCURRENCE OF THE QUOTE CHARACTER AND A QUESTION MARK"
260 PRINT "APPEARS IN THE NEXT STATEMENT AFTER THIS PARAGRAPH. CHECK"
270 PRINT "THE NEXT LINE FOR THE PROCESSOR'S INTERPRETATION."
280 PRINT "                       *"?"
290 PRINT
300 PRINT "                               END TEST."
310 PRINT
320 PRINT "END PROGRAM 192"
330 END
