# Supplementary material
Source: MDPI journal article supplement (https://www.mdpi.com/2073-431X/3/3/69)
Supplement: s1 [file s1 › ./MinimalBASIC/NBS/P204.BAS]

10 PRINT "PROGRAM FILE 204: ERROR - PRINT-STATEMENTS CONTAINING"
15 PRINT "        LOWERCASE CHARACTERS."
20 PRINT "    ANSI STANDARD 3.2, 3.4, 12.2"
30 PRINT
40 PRINT "SECTION 204.1: ERROR - PRINT-STATEMENTS CONTAINING"
45 PRINT "        LOWERCASE CHARACTERS."
50 PRINT
60 PRINT "THIS PROGRAM TESTS TO SEE IF THE PROCESSOR ACCEPTS PROGRAMS"
70 PRINT "CONTAINING LOWER CASE CHARACTERS IN A PRINT-STATEMENT."
80 PRINT
90 PRINT "THIS IS A TEST FOR A NON-STANDARD FEATURE OF MINIMAL BASIC."
100 PRINT "TO PASS THIS TEST, THE PROCESSOR MUST EITHER:"
110 PRINT
120 PRINT "1) ACCEPT THE PROGRAM AND BE ACCOMPANIED BY DOCUMENTATION"
130 PRINT "   ACCURATELY DESCRIBING THE FEATURE'S INTERPRETATION"
140 PRINT "   BY THE PROCESSOR, OR"
150 PRINT
160 PRINT "2) REJECT THE PROGRAM WITH AN APPROPRIATE ERROR MESSAGE"
170 PRINT
180 PRINT "SEE THE NBS MINIMAL BASIC TEST PROGRAMS USER'S MANUAL"
190 PRINT "FOR DETAILED CRITERIA."
200 PRINT
210 PRINT "                              BEGIN TEST."
220 print
230 PRINT "IF A BLANK LINE IMMEDIATELY PRECEDES THIS SENTENCE, THEN"
240 PRINT "THE PROCESSOR EXECUTED A PRINT STATEMENT IN WHICH THE"
250 PRINT "WORD 'PRINT' APPEARS IN LOWERCASE LETTERS."
260 PRINT
270 PRINT
280 PRINT "this sentence is generated by a quoted-string print-item"
290 PRINT "containing lower-case characters."
320 PRINT
330 PRINT "                               END TEST."
340 PRINT
350 PRINT "END PROGRAM 204"
360 END
