# Supplementary material
Source: MDPI journal article supplement (https://www.mdpi.com/2073-431X/3/3/69)
Supplement: s1 [file s1 › ./MinimalBASIC/NBS/P208.BAS]

10 PRINT "PROGRAM FILE 208: ERROR - ASSIGNMENT OF A NUMBER TO A"
20 PRINT "        STRING VARIABLE."
30 PRINT "    ANSI STANDARD 9.2"
40 PRINT
50 PRINT "SECTION 208.1: ERROR - ASSIGNMENT OF A NUMBER TO A"
60 PRINT "        STRING VARIABLE."
70 PRINT
80 PRINT "THIS IS A TEST FOR A NON-STANDARD FEATURE OF MINIMAL BASIC."
90 PRINT "TO PASS THIS TEST, THE PROCESSOR MUST EITHER:"
100 PRINT
110 PRINT "   1) ACCEPT THE PROGRAM AND BE ACCOMPANIED BY DOCUMENTATION"
120 PRINT "      ACCURATELY DESCRIBING THE FEATURE'S INTERPRETATION"
130 PRINT "      BY THE PROCESSOR, OR"
140 PRINT
150 PRINT "   2) REJECT THE PROGRAM WITH AN APPROPRIATE ERROR MESSAGE"
160 PRINT
170 PRINT "SEE THE NBS MINIMAL BASE TEST PROGRAMS USER'S MANUAL"
180 PRINT "FOR DETAILED CRITERIA."
190 PRINT
200 PRINT "                     BEGIN TEST."
210 PRINT
220 PRINT "SETTING A$='123' AND X=111"
240 LET A$="123"
250 LET X=111
260 PRINT "ABOUT TO EXECUTE: LET A$ = X"
270 LET A$=X
280 PRINT
290 PRINT "RESULTING VALUE OF A$ = ";A$
300 PRINT
310 PRINT "                      END TEST."
320 PRINT
330 PRINT "END PROGRAM 208"
340 END
