# Supplementary material
Source: MDPI journal article supplement (https://www.mdpi.com/2073-431X/3/3/69)
Supplement: s1 [file s1 › ./MinimalBASIC/NBS/README.NBS]

Passed   - Test passes as expected
TCE      - Test case error, impossible to pass the original test

The following tests were kindly supplied by Emmanuel Roche:
56, 57, 65, 66, 67, 68, 69, 109, 117, 118, 119, 120, 121, 122, 123, 124

P001.BAS - Passed - NULL PRINT AND PRINTING QUOTED STRINGS
P002.BAS - Passed - THE END-STATEMENT
P003.BAS - Passed - ERROR - MISPLACED END-STATEMENT
P004.BAS - Passed - ERROR - MISSING END-STATEMENT
P005.BAS - Passed - THE STOP-STATEMENT
P006.BAS - Passed - PRINT-SEPARATORS, TABS, AND STRING VARIABLES
P007.BAS - Passed - EXCEPTION - STRING OVERFLOW USING THE LET-STATEMENT
P008.BAS - Passed - EXCEPTION - TAB ARGUMENT LESS THAN ONE
P009.BAS - Passed - PRINTING NR1 AND NR2 NUMERIC CONSTANTS
P010.BAS - Passed - PRINTING NR3 NUMERIC CONSTANTS
P011.BAS - Passed - PRINTING NUMERIC VARIABLES ASSIGNED NR1 AND NR2 CONSTANTS
P012.BAS - Passed - PRINTING NUMERIC VARAIBLES ASSIGNED NR3 CONSTANTS
P013.BAS - Passed - FORMAT AND ROUNDING OF PRINTED NUMERIC CONSTANTS
P014.BAS - Passed - PRINTING AND ASSIGNING NUMERIC VALUES NEAR TO THE MAXIMUM AND MINIMUM MAGNITUDE
P015.BAS - Passed - THE REM AND GOTO STATEMENTS
P016.BAS - Passed - ERROR - TRANSFER TO A NON-EXISTING LINE NUMBER USING THE GOTO-STATEMENT
P017.BAS - Passed - ELEMENTARY USE OF GOSUB AND RETURN
P018.BAS - Passed - THE IF-THEN STATEMENT WITH STRING OPERANDS
P019.BAS - Passed - THE IF-THEN STATEMENT WITH NUMERIC OPERANDS
P020.BAS - Passed - ERROR - IF-THEN STATEMENT WITH A STRING AND NUMERIC OPERAND
P021.BAS - Passed - ERROR - TRANSFER TO NON-EXISTING LINE NUMBER USING THE IF-THEN-STATEMENT
P022.BAS - Passed - NUMERIC AND STRING VARIABLE NAMES WITH THE SAME INITIAL LETTER
P023.BAS - Passed - INITIALIZATION OF STRING AND NUMERIC VARIABLES
                    By 'Passed', I mean that the documented behavior occurs.
                    A fatal exception 'Read of uninitialized variable' will
                    occur specifying the variable name and line number. In
                    this specific case, the message is:
                    'Read of uninitialized variable A$ on line number 200'
P024.BAS - Passed - PLUS AND MINUS
P025.BAS - Passed - MULTIPLY, DIVIDE, AND INVOLUTE
P026.BAS -  TCE   - PRECEDENCE RULES FOR NUMERIC EXPRESSIONS
                    Section 26.1, test case 24 FAILS because this compiler
                    sees -2 as a constant with value negative two, not a
                    unary minus followed by a two.  This is a test case
                    error for ECMA-55, but may have been valid for ANSI.
                    See page 7 section 6.2 and 6.3 for proof.
P027.BAS - Passed - ACCURACY OF CONSTANTS AND VARIABLES
                    NBS example accuracy is 8 decimal, 27 binary digits
                    We have 7 decimal, 24 binary digits for 32bit
                           16 decimal, 43 binary digits for 64bit
P028.BAS - Passed - EXCEPTION - DIVISION BY ZERO
P029.BAS - Passed - EXCEPTION - OVERFLOW OF NUMERIC EXPRESSIONS
                    Does not give second overflow execption like it should
                    and fails instead.  This is due to the hard-coded constant
                    on line 780.
P030.BAS - Passed - EXCEPTION - OVERFLOW OF NUMERIC CONSTANTS
P031.BAS - Passed - EXCEPTION - ZERO RAISED TO A NEGATIVE POWER
P032.BAS - Passed - EXCEPTION - NEGATIVE QUANTITY RAISED TO A NON-INTEGRAL POWER
                    Exception message could be better
P033.BAS - Passed - EXCEPTION - UNDERFLOW OF NUMERIC EXPRESSIONS
                    Exception occurs when dividing by 12.5893, which is what
                    Intel's hardware will do.
P034.BAS - Passed - EXCEPTION - UNDERFLOW OF NUMERIC CONSTANTS
                    No exception reported, but program does continue using
                    a substituted zero value as it should
P035.BAS - Passed - EXCEPTION - OVERFLOW AND UNDERFLOW WITHIN SUB-EXPRESSIONS
P036.BAS - Passed - ERROR - UNMATCHED PARENTHESES IN NUMERIC EXPRESSION
P037.BAS - Passed - ERROR - USE OF '**' AS OPERATOR
P038.BAS -  TCE   - ERROR - USE OF ADJACENT OPERATORS
                    Program atually runs fine since -2 is treated as a
                    constant, and not a unary minus followed by two.
                    This is a test case error for ECMA-55, but may have 
                    been valid for ANSI.  See page 7 section 6.2 and 6.3 
                    for proof.
P039.BAS - Passed - ACCURACY OF ADDITION
P040.BAS - Passed - ACCURACY OF SUBTRACTION
P041.BAS - Passed - ACCURACY OF MULTIPLICATION
P042.BAS - Passed - ACCURACY OF DIVISION
P043.BAS - Passed - ACCURACY OF INVOLUTION
P044.BAS - Passed - ELEMENTARY USE OF THE FOR-STATEMENT
P045.BAS - Passed - ALTERING THE CONTROL-VARIABLE WITHIN A FOR-BLOCK
P046.BAS - Passed - INTERACTION OF CONTROL STATEMENTS WITH THE FOR-STATEMENT
P047.BAS - Passed - INCREMENT IN THE STEP CLAUSE OF THE FOR-STATEMENT DEFAULTS TO A VALUE OF ONE
P048.BAS - Passed - LIMIT AND INCREMENT IN THE FOR-STATEMENT ARE EVALUATED ONCE UPON ENTERING THE LOOP
P049.BAS - Passed - NESTED FOR-BLOCKS
P050.BAS - Passed - ERROR - FOR-STATEMENT WITHOUT A MATCHING NEXT-STATMENT
P051.BAS - Passed - ERROR - NEXT-STATMENT WITHOUT A MATCHING FOR-STATEMENT
P052.BAS - Passed - ERROR - MISMATCHED CONTROL-VARIABLES ON FOR-STATEMENT AND NEXT-STATEMENT
P053.BAS - Passed - ERROR - INTERLEAVED FOR-BLOCKS
P054.BAS - Passed - ERROR - NESTED FOR-BLOCKS WITH THE SAME CONTROL VARIABLE
P055.BAS - Passed - ERROR - JUMP INTO FOR-BLOCK
P056.BAS - Passed - ARRAY ASSIGNMENT WITHOUT THE OPTION-STATEMENT
P057.BAS - Passed - ARRAY ASSIGNMENT WITH OPTION BASE 0
P058.BAS - Passed - ARRAY ASSIGNMENT WITH OPTION BASE 1
P059.BAS - Passed - ARRAY NAMED 'A' IS DISTINCT FROM 'A$'
P060.BAS - Passed - NUMERIC CONSTANTS USED AS SUBSCRIPTS
P061.BAS - Passed - NUMERIC EXPRESSIONS CONTAINING SUBSCRIPTED VARIABLES
P062.BAS - Passed - GENERAL SYNTACTIC AND SEMANTIC PROPERTIES OF ARRAY CONTROL STATEMENTS: OPTION AND DIM
P063.BAS - Passed - EXCEPTION - SUBSCRIPT TOO LARGE FOR ONE-DIMENSIONAL ARRAY
P064.BAS - Passed - EXCEPTION - SUBSCRIPT TOO SMALL FOR TWO-DIMENSIONAL ARRAY
P065.BAS - Passed - EXCEPTION - SUBSCRIPT TOO SMALL FOR ONE-DIMENSIONAL ARRAY, WITH DIM
P066.BAS - Passed - EXCEPTION - SUBSCRIPT TOO LARGE FOR TWO-DIMENSIONAL ARRAY, WITH DIM
P067.BAS - Passed - EXCEPTION - SUBSCRIPT TOO SMALL FOR ONE-DIMENSIONAL ARRAY, WITH OPTION BASE 1
P068.BAS - Passed - EXCEPTION - SUBSCRIPT TOO LARGE FOR ONE-DIMENSIONAL ARRAY, WITH DIM AND OPTION BASE 1
P069.BAS - Passed - EXCEPTION - SUBSCRIPT TOO LARGE FOR TWO-DIMENSIONAL ARRAY, WITH DIM AND OPTION BASE 0
P070.BAS - Passed - EXCEPTION - SUBSCRIPT TOO SMALL FOR ONE-DIMENSIONAL ARRAY, WITH OPTION BASE 0
P071.BAS - Passed - EXCEPTION - SUBSCRIPT TOO SMALL FOR TWO-DIMENSIONAL ARRAY, WITH DIM AND OPTION BASE 0
P072.BAS - Passed - EXCEPTION - SUBSCRIPT TOO SMALL FOR TWO-DIMENSIONAL ARRAY, WITH DIM AND OPTION BASE 1
P073.BAS - Passed - ERROR - DIM SETS UPPER BOUND OF ZERO WITH OPTION BASE 1
P074.BAS - Passed - ERROR - DIM SETS ARRAY TO ONE DIMENSION AND REFERENCE IS MADE TO TWO-DIMENSIONAL VARIABLE OF SAME NAME
P075.BAS - Passed - ERROR - DIM SETS ARRAY TO ONE DIMENSION AND REFERENCE IS MADE TO SIMPLE VARIABLE OF SAME NAME
P076.BAS - Passed - ERROR - DIM SETS ARRAY TO TWO DIMENSIONS AND REFERENCE IS MADE TO ONE-DIMENSTIONAL VARIABLE OF SAME NAME
P077.BAS - Passed - ERROR - REFERENCE TO ARRAY AND SIMPLE VARIABLE OF SAME NAME
P078.BAS - Passed - ERROR - REFERENCE TO ONE-DIMENSIONAL AND TWO-DIMENSIONAL VARIABLE OF SAME NAME
P079.BAS - Passed - ERROR - REFERENCE TO ARRAY WITH LETTER-DIGIT NAME
P080.BAS - Passed - ERROR - MULTIPLE OPTION STATEMENTS
                    Error reported, but error message could be improved
P081.BAS - Passed - ERROR - DIM-STATEMENT PRECEDES OPTION-STATEMENT
                    Error reported, but error message could be improved
P082.BAS - Passed - ERROR - ARRAY REFERENCE PRECEDES OPTION-STATEMENT
                    Error reported, but error message could be improved
P083.BAS - Passed - ERROR - ARRAY-REFERENCE PRECEDES DIM-STATEMENT
P084.BAS - Passed - ERROR - DIMENSIONING THE SAME ARRAY MORE THAN ONCE
P085.BAS - Passed - GENERAL CAPABILITIES OF GOSUB/RETURN
P086.BAS - Passed - EXCEPTION - RETURN WITHOUT GOSUB
P087.BAS - Passed - ERROR - TRANSFER TO NON-EXISTING LINE NUMBER WHEN USING THE GOSUB-STATEMENT
P088.BAS - Passed - THE ON-GOTO-STATEMENT
P089.BAS - Passed - EXCEPTION - ON-GOTO CONTROL EXPRESSION LESS THAN 1
P090.BAS - Passed - EXCEPTION - ON-GOTO CONTROL EXPRESSION GREATER THAN NUMBER OF LINE-NUMBERS IN LIST
P091.BAS - Passed - ERROR - TRANSFER TO NON-EXISTING LINE NUMBER USING THE ON-GOTO-STATEMENT
P092.BAS - Passed - READ AND DATA STATEMENTS FOR NUMERIC DATA
P093.BAS - Passed - READ AND DATA STATEMENTS FOR STRING DATA
P094.BAS - Passed - READING DATA INTO SUBSCRIPTED VARIABLES
P095.BAS - Passed - GENERAL USE OF THE READ, DATA, AND RESTORE STATEMENTS.
P096.BAS - Passed - EXCEPTION - NUMERIC UNDERFLOW WHEN READING DATA CAUSES REPLACEMENT BY ZERO
P097.BAS - Passed - EXCEPTION - INSUFFICIENT DATA FOR READ
P098.BAS - Passed - EXCEPTION - READING UNQUOTED STRING DATA INTO A NUMERIC VARIABLE
P099.BAS - Passed - EXCEPTION - READING QUOTED STRING DATA INTO A NUMERIC VARIABLE
P100.BAS -  TCE   - EXCEPTION - STRING OVERFLOW ON READ
                    Line 5 has an unquoted string longer than 18 bytes which
                    is rejected at compile time by my compiler.
P101.BAS - Passed - EXCEPTION - NUMERIC OVERFLOW ON READ
P102.BAS - Passed - ERROR - ILLEGAL CHARACTER IN UNQUOTED STRING IN DATA STATEMENT
P103.BAS - Passed - ERROR - READING QUOTED STRINGS CONTAINING SINGLE QUOTE
                    Error message coulde be better....
P104.BAS - Passed - ERROR - READING QUOTED STRINGS CONTAINING DOUBLE QUOTE
                    Error message coulde be better....
P105.BAS - Passed - ERROR - NULL DATUM IN DATA-LIST
P106.BAS - Passed - ERROR - NULL ENTRY IN READ'S VARIABLE-LIST
P107.BAS - Passed - INPUT OF NUMERIC CONSTANTS
P108.BAS - Passed - INPUT TO SUBSCRIPTED VARIABLES
P109.BAS - Passed - STRING INPUT
P110.BAS - Passed - MIXED INPUT OF STRINGS AND NUMBERS
P111.BAS - Passed - EXCEPTION - NUMERIC UNDERFLOW ON INPUT CAUSES REPLACEMENT BY ZERO
P112.BAS - Passed - EXCEPTION - INPUT-REPLY INCONSISTENT WITH INPUT VARIABLE-LIST
P113.BAS - Passed - ERROR - NULL ENTRY IN INPUT-LIST
P114.BAS - Passed - EVALUATION OF ABS FUNCTION
P115.BAS - Passed - EVALUATION OF INT FUNCTION
P116.BAS - Passed - EVALUATION OF SGN FUNCTION
P117.BAS - Passed - ACCURACY OF SQR FUNCTION
P118.BAS - Passed - EXCEPTION - SQR OF NEGATIVE ARGUMENT
P119.BAS - Passed - ACCURACY OF ATN FUNCTION
P120.BAS - Passed - ACCURACY OF COS FUNCTION
P121.BAS - Passed - ACCURACY OF EXP FUNCTION
                    Note that in 32bit mode, there is one exception thrown
                    'Arithmetic underflow on line number 520' just once
                    before the first line of data.  This is an unfortunate
                    result of float<->double conversion issues because EXP() 
                    uses 64bit double but add, subtract, divide and multiply 
                    are 32bit, and also the constants in the program are all
                    32bit.
P122.BAS - Passed - EXCEPTION - OVERFLOW ON VALUE OF EXP FUNCTION
P123.BAS - Passed - EXCEPTION - UNDERFLOW ON VALUE OF EXP FUNCTION
P124.BAS - Passed - ACCURACY OF LOG FUNCTION
P125.BAS - Passed - EXCEPTION - LOG OF ZERO ARGUMENT
P126.BAS - Passed - EXCEPTION - LOG OF NEGATIVE ARGUMENT
P127.BAS - Passed - ACCURACY OF SIN FUNCTION
P128.BAS - Passed - ACCURACY OF TAN FUNCTION
P129.BAS -  TCE   - EXCEPTION - OVERFLOW ON VALUE OF TAN FUNCTION
                    NOTE: the implementation of TAN() used for the
                    runtime of this BASIC implementaiton does not
                    overflow for either +/-PI/2 even if a full double
                    exact value of '0x3FF921FB54442D18' is used.
P130.BAS - Passed - RND FUNCTION WITHOUT RANDOMIZE STATEMENT
P131.BAS - Passed - RND FUNCTION WITH THE RANDOMIZE STATEMENT
                    NOTE: This test has to be run by hand to verify it
                    since the output is different every run by design.
P132.BAS - Passed - AVERAGE OF RANDOM NUMBERS APPROXIMATES 0.5 AND 0 <= RND < 1
P133.BAS - Passed - CHI-SQURE UNIFORMTIY TEST FOR RND FUNCTION
P134.BAS -  TCE   - KOMOLGOROV-SMIRNOV UNIFORMITY TEST FOR RND FUNCTION
                    Read of uninitialized element in array P on line number 420
                    Modified test so it now passes.
P135.BAS - Passed - SERIAL TEST FOR RANDOMNESS
P136.BAS -  TCE   - GAP TEST FOR RND FUNCTION
                    Crash, read uninitialized variable S on line 650
                    Modified test so it now passes.
P137.BAS - Passed - POKER TEST FOR RND FUNCTION
P138.BAS - Passed - COUPON COLLECTOR TEST OF RND FUNCTION
P139.BAS - Passed - PERMUTATION TEST FOR THE RND FUNCTION
P140.BAS - Passed - RUNS TEST FOR THE RND FUNCTION
P141.BAS - Passed - MAXIMUM OF GROUP TEST OF RND FUNCTION
P142.BAS - Passed - SERIAL CORRELATION TEST OF RND FUNCTION
P143.BAS - Passed - ERROR - TWO ARGUMENTS IN LIST FOR SIN FUNCTION
P144.BAS - Passed - ERROR - TWO ARGUMENTS IN LIST FOR ATN FUNCTION
P145.BAS - Passed - ERROR - TWO ARGUMENTS IN LIST FOR RND FUNCTION
P146.BAS - Passed - ERROR - ONE ARGUMENT IN LIST FOR RND FUNCTION
P147.BAS - Passed - ERROR - NULL ARGUMENT-LIST FOR INT FUNCTION
                    Error message could be better...
P148.BAS - Passed - ERROR - MISSING ARGUMENT LIST FOR TAN FUNCTION
P149.BAS - Passed - ERROR - NULL ARGUMENT-LIST FOR RND FUNCTION
P150.BAS - Passed - ERROR USING A STRING AS AN ARGUMENT FOR AN IMPLEMENTATION-SUPPLIED FUNCTION
P151.BAS - Passed - USER-DEFINED FUNCTIONS
P152.BAS - Passed - VALID NAMES FOR USER-DEFINED FUNCTIONS
P153.BAS - Passed - ERROR - SUPERFLUOUS ARGUMENT-LIST FOR USER-DEFINED FUNCTION
P154.BAS - Passed - ERROR - MISSING ARGUMENT-LIST FOR USER-DEFINED FUNCTION
P155.BAS - Passed - ERROR - NULL ARGUMENT-LIST FOR USER-DEFINED FUNCTION
P156.BAS - Passed - ERROR - EXCESS ARGUMENT IN LIST FOR USER-DEFINED FUNCTION
                    Error message could be better...
P157.BAS - Passed - ERROR - USER-DEFINED FUNCTION WITH TWO PARAMETERS
                    Error message could be better...
P158.BAS - Passed - ERROR - USING A STRING AS AN ARGUMENT FOR A USER-DEFINED FUNCTION
                    Error message could be better...
P159.BAS - Passed - ERROR - USING A STRING AS AN ARGUMENT AND PARAMETER FOR A USER-DEFINED FUNCTION
P160.BAS - Passed - ERROR - FUNCTION DEFINED MORE THAN ONCE
P161.BAS - Passed - ERROR - REFERENCING A FUNCTION INSIDE ITS OWN DEFINITION
P162.BAS - Passed - ERROR - REFERENCE TO A FUNCTION PRECEDES ITS DEFINITION
                    Error message could be better...
P163.BAS - Passed - ERROR - REFERENCE TO AN UNDEFINED FUNCTION
                    Error message could be better...
P164.BAS - Passed - GENERAL USE OF NUMERIC EXPRESSION IN LET-STATEMENT
P165.BAS - Passed - COMPOUND EXPRESSIONS AND PRINT
P166.BAS - Passed - COMPOUND EXPRESSIONS USED WITH CONTROL STATEMENTS AND FOR-STATEMENTS
P167.BAS - Passed - EXCEPTION - EVALUATION OF NUMERIC EXPRESSION ACTING AS FUNCTION ARGUMENTS
P168.BAS - Passed - EXCEPTION - OVERFLOW IN THE SUBSCRIPT OF AN ARRAY
P169.BAS - Passed - EXCEPTION - NUMERIC UNDERFLOW IN THE EVALUATION OF NUMERIC EXPRESSION ACTING AS ARGUMENTS AND SUBSCRIPTS
P170.BAS - Passed - EXCEPTION - NEGATIVE QUANTITY RAISED TO A NON-INTEGRAL POWER IN A SUBSCRIPT
                    Error message could be better...
P171.BAS - Passed - EXCEPTION - LOG OF A NEGATIVE QUANTITY IN AN ARGUMENT
P172.BAS - Passed - EXCEPTION - SQR OF NEGATIVE QUANTITY IN PRINT-ITEM
P173.BAS - Passed - EXCEPTION - NEGATIVE QUANTITY RAISED TO A NON-INTEGRAL POWER IN TAB-ITEM
                    Error message could be better...
P174.BAS - Passed - EXCEPTION - EVALUATION OF NUMERIC EXPRESSION IN THE PRINT STATEMENT
P175.BAS - Passed - EXCEPTION - UNDERFLOW IN THE EVALUATION OF NUMERIC EXPRESSION IN THE PRINT STATEMENT
P176.BAS - Passed - EXCEPTION - NEGATIVE QUANTITY RAISED TO A NON-INTEGRAL POWER IN IF-STATEMENT
P177.BAS - Passed - EXCEPTION - EVALUATION OF NUMERIC EXPRESSIONS IN THE IF-STATEMENT
P178.BAS - Passed - EXCEPTION - UNDERFLOW IN THE EVALUATION OF NUMERIC EXPRESSIONS IN THE IF-STATEMENT
P179.BAS - Passed - EXCEPTION - LOG OF ZERO IN ON-GOTO-STATEMENT
P180.BAS - Passed - EXCEPTION - EVALUATION OF NUMERIC EXPRESSIONS IN THE ON-GOTO STATEMENT
P181.BAS - Passed - EXCEPTION - UNDERFLOW IN THE EVALUATION OF THE EXP FUNCTION IN THE ON-GOTO STATEMENT
P182.BAS - Passed - EXCEPTION - NEGATIVE QUANTITY RAISED TO A NON-INTEGRAL POWER IN FOR-STATEMENT
P183.BAS - Passed - EXCEPTION - EVALUATION OF NUMERIC EXPRESSIONS IN THE FOR-STATEMENT
P184.BAS - Passed - EXCEPTION - UNDERFLOW IN THE EVALUATION OF NUMERIC EXPRESSIONS IN THE FOR-STATMEENT
P185.BAS - Passed - ERROR - MISSING KEYWORD LET
P186.BAS - Passed - EXTRA SPACES HAVE NO EFFECT
P187.BAS - Passed - ERROR - SPACES AT THE BEGINNING OF A LINE
P188.BAS - Passed - ERROR - SPACES WITHIN LINE-NUMBERS
                    Error message could be better.
P189.BAS - Passed - ERROR - SPACES WITHIN KEYWORDS
P190.BAS - Passed - ERROR - NO SPACES BEFORE KEYWORDS
P191.BAS - Passed - ERROR - NO SPACES AFTER KEYWORDS
P192.BAS - Passed - ERROR - PRINT-ITEM QUOTED STRINGS
                    Error message could be better.
P193.BAS - Passed - ERROR - PRINT-ITEM QUOTED STRINGS
P194.BAS - Passed - ERROR - ASSIGNED QUOTED STRINGS CONTAINING SINGLE QUOTE
                    Error message could be better.
P195.BAS - Passed - ERROR - ASSIGNED QUOTED STRING CONTAINING DOUBLE QUOTES
P196.BAS - Passed - LINE-NUMBERS WITH LEADING ZEROS
P197.BAS - Passed - ERROR - DUPLICATE LINE-NUMBERS
P198.BAS - Passed - ERROR - LINES OUT OF ORDER
P199.BAS - Passed - ERROR - FIVE-DIGIT LINE-NUMBERS
P200.BAS - Passed - ERROR - LINE-NUMBER ZERO
P201.BAS - Passed - ERROR - STATEMENTS WITHOUT LINE-NUMBERS
P202.BAS - Passed - ERROR - LINES LONGER THAN 72 CHARACTERS
P203.BAS - Passed - EFFECT OF ZONES AND MARGIN ON PRINT
                    PLEASE ENTER ZONE-WIDTH FOR THIS IMPLEMENTATION.
                    15
                    PLEASE ENTER MARGIN FOR THIS IMPLEMENTATION.
                    73
                    PLEASE ENTER NUMBER OF PRINT ZONES ON A LINE.
                    5
                    NOTE: original version had a cosmetic error on line
                    2540 that make it print incorrect column header for
                    132 columns; this is fixed in the version here.
P204.BAS - Passed - ERROR - PRINT-STATEMENTS CONTAINING LOWERCASE CHARACTERS
P205.BAS - Passed - ERROR - ASSIGNED STRING CONTAINING LOWERCASE CHARACTERS
                    Lowercase string was accepted
                    This is a 'documented extension'.
P206.BAS - Passed - ERROR - ORDERING RELATIONS BETWEEN STRINGS
P207.BAS - Passed - ERROR - ASSIGNMENT OF A STRING TO A NUMERIC VARIABLE
                    Error message could be better
P208.BAS - Passed - ERROR - ASSIGNMENT OF A NUMBER TO A STRING VARIABLE
